# Supplementary material for: Genetic Diversity and Population Structure in a Regional Collection of Kersting’s Groundnut (<em>Macrotyloma geocarpum </em>(Harms) Maréchal & Baudet)
Source: Preprints.org preprint supplement (doi:10.20944/preprints202009.0097.v1), 2020-09-04
Supplement: Supplementary file 1 [file Table S1.docx]

Table S1. F ilter criteria and number of SNPs removed and remaining

| **Filter** | **SNPs removed** | **SNPs remaining** |
| --- | --- | --- |
| Missing data <50% | 246 | 1692 |
| Read Depth >5 | 458 | 1234 |
| Call Rate >0.75 | 285 | 949 |
| Reproducibility >0.95 | 1 | 948 |
| PIC SNP > 0 | 62 | 886 |
| **Total** | **1052** | **886** |
