# Supplementary material for: Genetic Diversity and Population Structure in a Regional Collection of Kersting’s Groundnut (<em>Macrotyloma geocarpum </em>(Harms) Maréchal & Baudet)
Source: Preprints.org preprint supplement (doi:10.20944/preprints202009.0097.v1), 2020-09-04
Supplement: Supplementary file 2 [file Table S2.xlsx]

## Sheet: Sheet1
Table S2: Diversity and differencitation metrics of filtered 886 SNP markers
Loci	Hs	Ht	Gst	Gprime_st	D
100119826-68-T/A	0.00219808	0.0021693	-0.0132662	-0.0155457	-3.36486e-05
100120457-68-G/C	0.00643428	0.00636682	-0.0105956	-0.0124636	-7.92136e-05
100120574-68-A/G	0.0042362	0.00420661	-0.00703361	-0.00825046	-3.46658e-05
100121256-68-C/A	0.00219808	0.0021693	-0.0132662	-0.0155457	-3.36486e-05
100121860-68-T/A	0.0043626	0.0043338	-0.00664364	-0.00779351	-3.37381e-05
100122050-68-A/G	0.00834595	0.00839516	0.00586214	0.00688999	5.78991e-05
100123986-68-G/C	0.0030137	0.00298155	-0.0107844	-0.0126426	-3.76268e-05
100124204-68-T/A	0.00573028	0.00571657	-0.00239753	-0.00281436	-1.6082e-05
100157183-68-G/C	0.00834595	0.00839516	0.00586214	0.00688999	5.78991e-05
100159517-68-T/A	0.0145776	0.0149719	0.0263372	0.031045	0.000466843
100160385-68-G/A	0.0723842	0.079294	0.0871417	0.10803	0.0086905
100171149-68-C/A	0.00834595	0.00839516	0.00586214	0.00688999	5.78991e-05
100171360-68-C/T	0.0030137	0.00298155	-0.0107844	-0.0126426	-3.76268e-05
100171667-68-T/A	0.00521178	0.00514441	-0.0130967	-0.0153931	-7.90155e-05
100174092-68-C/G	0.0043626	0.0043338	-0.00664364	-0.00779351	-3.37381e-05
100174752-68-T/A	0.00219808	0.0021693	-0.0132662	-0.0155457	-3.36486e-05
100181264-68-C/A	0.0043626	0.0043338	-0.00664364	-0.00779351	-3.37381e-05
100184002-68-A/C	0.0043626	0.0043338	-0.00664364	-0.00779351	-3.37381e-05
100184913-68-G/C	0.0156533	0.0155643	-0.00571829	-0.00678389	-0.000105486
100185358-68-G/C	0.0030137	0.00298155	-0.0107844	-0.0126426	-3.76268e-05
100192118-68-T/A	0.0043626	0.0043338	-0.00664364	-0.00779351	-3.37381e-05
100192685-68-T/C	0.00219808	0.0021693	-0.0132662	-0.0155457	-3.36486e-05
100196764-68-T/A	0.0030137	0.00298155	-0.0107844	-0.0126426	-3.76268e-05
100202868-68-T/A	0.0112267	0.0113997	0.0151815	0.0178676	0.000204202
100209330-68-C/T	0.0797103	0.0838833	0.0497474	0.0625471	0.00529015
100209850-68-T/C	0.0145776	0.0149719	0.0263372	0.031045	0.000466843
100214178-68-T/C	0.00219808	0.0021693	-0.0132662	-0.0155457	-3.36486e-05
100215956-68-T/A	0.00573028	0.00571657	-0.00239753	-0.00281436	-1.6082e-05
100216832-68-G/C	0.00859096	0.00864843	0.00664548	0.00781159	6.76328e-05
100221863-68-T/A	0.259952	0.329988	0.212238	0.323157	0.11041
100224288-68-C/T	0.00219808	0.0021693	-0.0132662	-0.0155457	-3.36486e-05
100225497-68-T/A	0.0030137	0.00298155	-0.0107844	-0.0126426	-3.76268e-05
100227117-68-A/T	0.00816204	0.00811045	-0.00636072	-0.00748985	-6.06817e-05
100227847-68-T/G	0.00749124	0.00751486	0.00314263	0.00369214	2.77605e-05
100229570-68-A/C	0.0137435	0.0136226	-0.00887487	-0.0105138	-0.000143014
100119867-67-G/A	0.0030137	0.00298155	-0.0107844	-0.0126426	-3.76268e-05
100120484-67-T/C	0.0167756	0.0171086	0.0194633	0.0230199	0.000395117
100121032-67-C/T	0.00834595	0.00839516	0.00586214	0.00688999	5.78991e-05
100122109-67-A/G	0.0116741	0.0118718	0.0166511	0.0196013	0.000233349
100122195-67-C/A	0.0030137	0.00298155	-0.0107844	-0.0126426	-3.76268e-05
100122942-67-C/A	0.0030137	0.00298155	-0.0107844	-0.0126426	-3.76268e-05
100123263-67-T/A	0.0030137	0.00298155	-0.0107844	-0.0126426	-3.76268e-05
100123427-67-G/A	0.00219808	0.0021693	-0.0132662	-0.0155457	-3.36486e-05
100123597-67-G/A	0.00219808	0.0021693	-0.0132662	-0.0155457	-3.36486e-05
100124631-67-G/A	0.00219808	0.0021693	-0.0132662	-0.0155457	-3.36486e-05
100125768-67-T/A	0.0030137	0.00298155	-0.0107844	-0.0126426	-3.76268e-05
100126243-67-C/A	0.0043626	0.0043338	-0.00664364	-0.00779351	-3.37381e-05
100127130-67-T/C	0.00219808	0.0021693	-0.0132662	-0.0155457	-3.36486e-05
100127304-67-T/C	0.00573028	0.00571657	-0.00239753	-0.00281436	-1.6082e-05
100157863-67-G/C	0.00219808	0.0021693	-0.0132662	-0.0155457	-3.36486e-05
100158288-67-T/A	0.0116741	0.0118718	0.0166511	0.0196013	0.000233349
100159727-67-T/A	0.00219808	0.0021693	-0.0132662	-0.0155457	-3.36486e-05
100160756-67-C/T	0.00219808	0.0021693	-0.0132662	-0.0155457	-3.36486e-05
100171120-67-T/A	0.0042362	0.00420661	-0.00703361	-0.00825046	-3.46658e-05
100171398-67-T/A	0.00219808	0.0021693	-0.0132662	-0.0155457	-3.36486e-05
100171458-67-T/A	0.0790215	0.08314	0.0495362	0.0622371	0.00521711
100172398-67-C/A	0.0043626	0.0043338	-0.00664364	-0.00779351	-3.37381e-05
100174138-67-C/T	0.106818	0.130403	0.180867	0.229334	0.0308074
100175550-67-G/C	0.0108122	0.0109637	0.0138256	0.0162687	0.000178777
100181973-67-T/A	0.00219808	0.0021693	-0.0132662	-0.0155457	-3.36486e-05
100183458-67-G/C	0.0042362	0.00420661	-0.00703361	-0.00825046	-3.46658e-05
100185700-67-A/T	0.0043626	0.0043338	-0.00664364	-0.00779351	-3.37381e-05
100189953-67-G/A	0.00749124	0.00751486	0.00314263	0.00369214	2.77605e-05
100191533-67-C/A	0.00573028	0.00571657	-0.00239753	-0.00281436	-1.6082e-05
100192303-67-T/A	0.0042362	0.00420661	-0.00703361	-0.00825046	-3.46658e-05
100193279-67-G/T	0.0108122	0.0109637	0.0138256	0.0162687	0.000178777
100197716-67-T/A	0.0042362	0.00420661	-0.00703361	-0.00825046	-3.46658e-05
100197886-67-A/T	0.0223331	0.0235986	0.0536251	0.0634249	0.00151012
100199316-67-T/G	0.0118538	0.0118161	-0.00319265	-0.00377145	-4.45401e-05
100202363-67-T/A	0.00573028	0.00571657	-0.00239753	-0.00281436	-1.6082e-05
100204577-67-T/A	0.0030137	0.00298155	-0.0107844	-0.0126426	-3.76268e-05
100204818-67-T/A	0.0108122	0.0109637	0.0138256	0.0162687	0.000178777
100208586-67-A/T	0.00219808	0.0021693	-0.0132662	-0.0155457	-3.36486e-05
100212516-67-T/C	0.0410342	0.0454051	0.0962654	0.115266	0.00531764
100217109-67-A/T	0.00219808	0.0021693	-0.0132662	-0.0155457	-3.36486e-05
100220042-67-G/A	0.0030137	0.00298155	-0.0107844	-0.0126426	-3.76268e-05
100220273-67-C/A	0.0116741	0.0118718	0.0166511	0.0196013	0.000233349
100225184-67-T/G	0.00219808	0.0021693	-0.0132662	-0.0155457	-3.36486e-05
100119884-66-A/T	0.00219808	0.0021693	-0.0132662	-0.0155457	-3.36486e-05
100120660-66-C/T	0.0030137	0.00298155	-0.0107844	-0.0126426	-3.76268e-05
100121545-66-T/G	0.0030137	0.00298155	-0.0107844	-0.0126426	-3.76268e-05
100122581-66-A/G	0.0073763	0.00730247	-0.0101104	-0.0119031	-8.67757e-05
100123540-66-A/C	0.0042362	0.00420661	-0.00703361	-0.00825046	-3.46658e-05
100123879-66-T/A	0.00219808	0.0021693	-0.0132662	-0.0155457	-3.36486e-05
100125256-66-T/A	0.00219808	0.0021693	-0.0132662	-0.0155457	-3.36486e-05
100125539-66-T/A	0.0207594	0.0218039	0.0479073	0.0566246	0.0012445
100157176-66-A/G	0.00573028	0.00571657	-0.00239753	-0.00281436	-1.6082e-05
100157439-66-A/G	0.0116741	0.0118718	0.0166511	0.0196013	0.000233349
100158626-66-G/A	0.0030137	0.00298155	-0.0107844	-0.0126426	-3.76268e-05
100159707-66-C/T	0.0215178	0.0226658	0.0506505	0.0598862	0.00136883
100160484-66-G/C	0.00219808	0.0021693	-0.0132662	-0.0155457	-3.36486e-05
100160986-66-T/C	0.0204181	0.0204495	0.00153322	0.00182557	3.73416e-05
100161097-66-T/A	0.00219808	0.0021693	-0.0132662	-0.0155457	-3.36486e-05
100162669-66-G/C	0.21634	0.257307	0.159217	0.230905	0.0609901
100171613-66-T/A	0.00219808	0.0021693	-0.0132662	-0.0155457	-3.36486e-05
100172433-66-T/C	0.00219808	0.0021693	-0.0132662	-0.0155457	-3.36486e-05
100181488-66-C/A	0.00219808	0.0021693	-0.0132662	-0.0155457	-3.36486e-05
100181879-66-T/C	0.0112267	0.0113997	0.0151815	0.0178676	0.000204202
100182581-66-G/T	0.00596396	0.00595404	-0.00166712	-0.00195718	-1.16499e-05
100183005-66-A/G	0.204146	0.500575	0.592178	0.79011	0.434545
100184263-66-A/T	0.00749124	0.00751486	0.00314263	0.00369214	2.77605e-05
100184422-66-G/T	0.0145776	0.0149719	0.0263372	0.031045	0.000466843
100185260-66-C/A	0.00219808	0.0021693	-0.0132662	-0.0155457	-3.36486e-05
100190706-66-G/A	0.00573028	0.00571657	-0.00239753	-0.00281436	-1.6082e-05
100192825-66-A/T	0.0112267	0.0113997	0.0151815	0.0178676	0.000204202
100193037-66-T/A	0.00573028	0.00571657	-0.00239753	-0.00281436	-1.6082e-05
100193870-66-T/A	0.0030137	0.00298155	-0.0107844	-0.0126426	-3.76268e-05
100199597-66-G/A	0.0030137	0.00298155	-0.0107844	-0.0126426	-3.76268e-05
100199963-66-G/A	0.0108122	0.0109637	0.0138256	0.0162687	0.000178777
100202363-66-T/A	0.0207594	0.0218039	0.0479073	0.0566246	0.0012445
100202593-66-T/A	0.00749124	0.00751486	0.00314263	0.00369214	2.77605e-05
100203013-66-G/A	0.0116741	0.0118718	0.0166511	0.0196013	0.000233349
100207085-66-G/A	0.00219808	0.0021693	-0.0132662	-0.0155457	-3.36486e-05
100207520-66-G/A	0.0030137	0.00298155	-0.0107844	-0.0126426	-3.76268e-05
100207656-66-T/A	0.0116741	0.0118718	0.0166511	0.0196013	0.000233349
100214759-66-A/G	0.00596396	0.00595404	-0.00166712	-0.00195718	-1.16499e-05
100219042-66-C/T	0.209984	0.250501	0.161743	0.232587	0.0598338
100220197-66-T/A	0.00834595	0.00839516	0.00586214	0.00688999	5.78991e-05
100231495-66-C/A	0.00596396	0.00595404	-0.00166712	-0.00195718	-1.16499e-05
100120073-65-A/T	0.00749124	0.00751486	0.00314263	0.00369214	2.77605e-05
100120873-65-C/A	0.0030137	0.00298155	-0.0107844	-0.0126426	-3.76268e-05
100120976-65-G/A	0.0030137	0.00298155	-0.0107844	-0.0126426	-3.76268e-05
100121823-65-G/T	0.0108122	0.0109637	0.0138256	0.0162687	0.000178777
100122292-65-A/G	0.00219808	0.0021693	-0.0132662	-0.0155457	-3.36486e-05
100122407-65-T/A	0.0108122	0.0109637	0.0138256	0.0162687	0.000178777
100123121-65-A/G	0.0043626	0.0043338	-0.00664364	-0.00779351	-3.37381e-05
100124259-65-G/T	0.00219808	0.0021693	-0.0132662	-0.0155457	-3.36486e-05
100125469-65-A/G	0.00573028	0.00571657	-0.00239753	-0.00281436	-1.6082e-05
100127063-65-C/A	0.00219808	0.0021693	-0.0132662	-0.0155457	-3.36486e-05
100157281-65-C/T	0.00749124	0.00751486	0.00314263	0.00369214	2.77605e-05
100157393-65-C/A	0.0042362	0.00420661	-0.00703361	-0.00825046	-3.46658e-05
100157772-65-C/T	0.0108122	0.0109637	0.0138256	0.0162687	0.000178777
100158149-65-C/T	0.0030137	0.00298155	-0.0107844	-0.0126426	-3.76268e-05
100158280-65-A/T	0.0030137	0.00298155	-0.0107844	-0.0126426	-3.76268e-05
100158374-65-T/A	0.00749124	0.00751486	0.00314263	0.00369214	2.77605e-05
100158904-65-C/A	0.266854	0.331951	0.196104	0.302187	0.10359
100158978-65-T/A	0.0221718	0.0221904	0.000837282	0.000998838	2.21677e-05
100160597-65-T/C	0.00219808	0.0021693	-0.0132662	-0.0155457	-3.36486e-05
100171798-65-T/C	0.00219808	0.0021693	-0.0132662	-0.0155457	-3.36486e-05
100172602-65-C/A	0.0116741	0.0118718	0.0166511	0.0196013	0.000233349
100173247-65-C/T	0.0116741	0.0118718	0.0166511	0.0196013	0.000233349
100174251-65-C/A	0.0100929	0.0100256	-0.00670631	-0.00791265	-7.92406e-05
100174524-65-G/A	0.00749124	0.00751486	0.00314263	0.00369214	2.77605e-05
100184863-65-T/G	0.182594	0.494192	0.630521	0.814351	0.444738
100192480-65-C/T	0.0116741	0.0118718	0.0166511	0.0196013	0.000233349
100192738-65-A/C	0.0108122	0.0109637	0.0138256	0.0162687	0.000178777
100193775-65-T/C	0.00573028	0.00571657	-0.00239753	-0.00281436	-1.6082e-05
100197355-65-A/T	0.0043626	0.0043338	-0.00664364	-0.00779351	-3.37381e-05
100199212-65-T/A	0.00219808	0.0021693	-0.0132662	-0.0155457	-3.36486e-05
100200113-65-A/G	0.231282	0.481392	0.519555	0.725679	0.379585
100207089-65-T/A	0.0116741	0.0118718	0.0166511	0.0196013	0.000233349
100208552-65-C/T	0.00219808	0.0021693	-0.0132662	-0.0155457	-3.36486e-05
100209096-65-C/T	0.00573028	0.00571657	-0.00239753	-0.00281436	-1.6082e-05
100212142-65-C/T	0.0043626	0.0043338	-0.00664364	-0.00779351	-3.37381e-05
100217081-65-A/C	0.0112267	0.0113997	0.0151815	0.0178676	0.000204202
100218183-65-A/T	0.0030137	0.00298155	-0.0107844	-0.0126426	-3.76268e-05
100220294-65-G/A	0.00596396	0.00595404	-0.00166712	-0.00195718	-1.16499e-05
100222200-65-C/A	0.00573028	0.00571657	-0.00239753	-0.00281436	-1.6082e-05
100223962-65-C/A	0.0042362	0.00420661	-0.00703361	-0.00825046	-3.46658e-05
100224209-65-T/C	0.0145776	0.0149719	0.0263372	0.031045	0.000466843
100224360-65-A/T	0.0223331	0.0235986	0.0536251	0.0634249	0.00151012
100225159-65-T/G	0.00834595	0.00839516	0.00586214	0.00688999	5.78991e-05
100229260-65-C/A	0.0043626	0.0043338	-0.00664364	-0.00779351	-3.37381e-05
100229526-65-A/G	0.0042362	0.00420661	-0.00703361	-0.00825046	-3.46658e-05
100121262-64-C/A	0.0042362	0.00420661	-0.00703361	-0.00825046	-3.46658e-05
100121299-64-A/G	0.0030137	0.00298155	-0.0107844	-0.0126426	-3.76268e-05
100122007-64-A/T	0.0030137	0.00298155	-0.0107844	-0.0126426	-3.76268e-05
100122210-64-G/A	0.0138259	0.0139126	0.00623325	0.00736643	0.000102593
100122674-64-T/A	0.0130102	0.0131093	0.00755316	0.00891696	0.000117042
100124329-64-T/A	0.0042362	0.00420661	-0.00703361	-0.00825046	-3.46658e-05
100124816-64-T/C	0.0202729	0.0202925	0.000963587	0.00114726	2.32845e-05
100126682-64-A/T	0.0042362	0.00420661	-0.00703361	-0.00825046	-3.46658e-05
100157263-64-A/T	0.0030137	0.00298155	-0.0107844	-0.0126426	-3.76268e-05
100158656-64-C/T	0.0116741	0.0118718	0.0166511	0.0196013	0.000233349
100172320-64-G/T	0.00749124	0.00751486	0.00314263	0.00369214	2.77605e-05
100173227-64-C/T	0.00219808	0.0021693	-0.0132662	-0.0155457	-3.36486e-05
100174562-64-C/T	0.00219808	0.0021693	-0.0132662	-0.0155457	-3.36486e-05
100174648-64-T/C	0.0202729	0.0202925	0.000963587	0.00114726	2.32845e-05
100174890-64-C/T	0.00219808	0.0021693	-0.0132662	-0.0155457	-3.36486e-05
100181938-64-A/T	0.0112267	0.0113997	0.0151815	0.0178676	0.000204202
100183647-64-T/A	0.0107298	0.0106728	-0.00533252	-0.00629434	-6.71188e-05
100183964-64-C/A	0.0030137	0.00298155	-0.0107844	-0.0126426	-3.76268e-05
100189789-64-C/A	0.00573028	0.00571657	-0.00239753	-0.00281436	-1.6082e-05
100199072-64-G/A	0.0294844	0.0307727	0.0418658	0.0499785	0.0015487
100202485-64-G/A	0.00573028	0.00571657	-0.00239753	-0.00281436	-1.6082e-05
100203676-64-T/G	0.218225	0.261395	0.165151	0.239858	0.0644232
100204198-64-C/T	0.090724	0.201298	0.549305	0.645685	0.141874
100212225-64-T/C	0.0112267	0.0113997	0.0151815	0.0178676	0.000204202
100223796-64-C/A	0.00596396	0.00595404	-0.00166712	-0.00195718	-1.16499e-05
100225025-64-C/A	0.0043626	0.0043338	-0.00664364	-0.00779351	-3.37381e-05
100229086-64-C/A	0.00596396	0.00595404	-0.00166712	-0.00195718	-1.16499e-05
100230361-64-C/T	0.0112267	0.0113997	0.0151815	0.0178676	0.000204202
100230697-64-T/A	0.0043626	0.0043338	-0.00664364	-0.00779351	-3.37381e-05
100120479-63-C/T	0.00219808	0.0021693	-0.0132662	-0.0155457	-3.36486e-05
100123810-63-A/C	0.0030137	0.00298155	-0.0107844	-0.0126426	-3.76268e-05
100157927-63-A/C	0.0030137	0.00298155	-0.0107844	-0.0126426	-3.76268e-05
100159027-63-G/A	0.00596396	0.00595404	-0.00166712	-0.00195718	-1.16499e-05
100159434-63-C/A	0.00219808	0.0021693	-0.0132662	-0.0155457	-3.36486e-05
100159809-63-C/T	0.00749124	0.00751486	0.00314263	0.00369214	2.77605e-05
100172791-63-A/T	0.00219808	0.0021693	-0.0132662	-0.0155457	-3.36486e-05
100173232-63-T/G	0.059398	0.0661249	0.10173	0.124076	0.00834365
100186320-63-G/A	0.0042362	0.00420661	-0.00703361	-0.00825046	-3.46658e-05
100190413-63-T/A	0.0030137	0.00298155	-0.0107844	-0.0126426	-3.76268e-05
100192471-63-G/A	0.00749124	0.00751486	0.00314263	0.00369214	2.77605e-05
100193208-63-A/G	0.0245312	0.0257164	0.046086	0.054699	0.00141746
100204354-63-C/A	0.0108122	0.0109637	0.0138256	0.0162687	0.000178777
100205161-63-T/A	0.0043626	0.0043338	-0.00664364	-0.00779351	-3.37381e-05
100221335-63-C/A	0.0659836	0.0736769	0.104419	0.128198	0.00960958
100231836-63-T/A	0.264827	0.307594	0.139038	0.215646	0.0678687
100119681-62-G/A	0.0042362	0.00420661	-0.00703361	-0.00825046	-3.46658e-05
100120125-62-C/T	0.00596396	0.00595404	-0.00166712	-0.00195718	-1.16499e-05
100120520-62-T/C	0.00219808	0.0021693	-0.0132662	-0.0155457	-3.36486e-05
100120860-62-A/G	0.0190504	0.0190873	0.00193224	0.00229731	4.38637e-05
100122079-62-A/C	0.0116741	0.0118718	0.0166511	0.0196013	0.000233349
100122141-62-G/T	0.00219808	0.0021693	-0.0132662	-0.0155457	-3.36486e-05
100123413-62-T/G	0.00573028	0.00571657	-0.00239753	-0.00281436	-1.6082e-05
100124586-62-G/C	0.0263125	0.0282487	0.0685423	0.0811994	0.00231998
100126870-62-T/C	0.00643428	0.00636682	-0.0105956	-0.0124636	-7.92136e-05
100157933-62-A/G	0.0030137	0.00298155	-0.0107844	-0.0126426	-3.76268e-05
100158780-62-G/A	0.0042362	0.00420661	-0.00703361	-0.00825046	-3.46658e-05
100172879-62-A/T	0.00749124	0.00751486	0.00314263	0.00369214	2.77605e-05
100174964-62-G/A	0.00219808	0.0021693	-0.0132662	-0.0155457	-3.36486e-05
100183880-62-C/T	0.00749124	0.00751486	0.00314263	0.00369214	2.77605e-05
100212999-62-T/C	0.0042362	0.00420661	-0.00703361	-0.00825046	-3.46658e-05
100214434-62-G/T	0.0043626	0.0043338	-0.00664364	-0.00779351	-3.37381e-05
100216028-62-C/A	0.0223331	0.0235986	0.0536251	0.0634249	0.00151012
100217579-62-T/C	0.0215178	0.0226658	0.0506505	0.0598862	0.00136883
100219774-62-G/A	0.0406057	0.0466171	0.128954	0.153514	0.00731019
100221158-62-A/T	0.213297	0.385157	0.446207	0.615913	0.254865
100221445-62-A/G	0.0145776	0.0149719	0.0263372	0.031045	0.000466843
100223900-62-T/A	0.0030137	0.00298155	-0.0107844	-0.0126426	-3.76268e-05
100119690-61-A/C	0.00834595	0.00839516	0.00586214	0.00688999	5.78991e-05
100120640-61-C/T	0.0043626	0.0043338	-0.00664364	-0.00779351	-3.37381e-05
100122273-61-T/C	0.00874398	0.00868111	-0.00724179	-0.00853358	-7.39916e-05
100125224-61-A/T	0.00749124	0.00751486	0.00314263	0.00369214	2.77605e-05
100156904-61-T/G	0.00573028	0.00571657	-0.00239753	-0.00281436	-1.6082e-05
100157798-61-A/C	0.0116741	0.0118718	0.0166511	0.0196013	0.000233349
100159855-61-A/G	0.0030137	0.00298155	-0.0107844	-0.0126426	-3.76268e-05
100186005-61-C/G	0.0042362	0.00420661	-0.00703361	-0.00825046	-3.46658e-05
100191830-61-G/T	0.0223331	0.0235986	0.0536251	0.0634249	0.00151012
100217499-61-G/T	0.00573028	0.00571657	-0.00239753	-0.00281436	-1.6082e-05
100221224-61-C/A	0.0112267	0.0113997	0.0151815	0.0178676	0.000204202
100119515-60-C/T	0.00219808	0.0021693	-0.0132662	-0.0155457	-3.36486e-05
100121685-60-T/G	0.0042362	0.00420661	-0.00703361	-0.00825046	-3.46658e-05
100121708-60-G/A	0.0108122	0.0109637	0.0138256	0.0162687	0.000178777
100126027-60-C/T	0.00643428	0.00636682	-0.0105956	-0.0124636	-7.92136e-05
100171151-60-A/T	0.0116741	0.0118718	0.0166511	0.0196013	0.000233349
100172153-60-G/A	0.00596396	0.00595404	-0.00166712	-0.00195718	-1.16499e-05
100196965-60-G/A	0.266059	0.491665	0.458861	0.677582	0.358622
100197025-60-C/A	0.00596396	0.00595404	-0.00166712	-0.00195718	-1.16499e-05
100209145-60-C/T	0.0030137	0.00298155	-0.0107844	-0.0126426	-3.76268e-05
100220416-60-A/C	0.00219808	0.0021693	-0.0132662	-0.0155457	-3.36486e-05
100224926-60-G/A	0.2501	0.482551	0.481712	0.693734	0.361638
100228835-60-T/C	0.0043626	0.0043338	-0.00664364	-0.00779351	-3.37381e-05
100120891-59-G/A	0.00834595	0.00839516	0.00586214	0.00688999	5.78991e-05
100122778-59-C/A	0.00573028	0.00571657	-0.00239753	-0.00281436	-1.6082e-05
100123494-59-A/G	0.0042362	0.00420661	-0.00703361	-0.00825046	-3.46658e-05
100175703-59-C/T	0.0189402	0.0192406	0.0156143	0.0185201	0.000357265
100203487-59-T/C	0.218417	0.271279	0.194861	0.281719	0.0789064
100217529-59-C/A	0.0108122	0.0109637	0.0138256	0.0162687	0.000178777
100228834-59-T/C	0.00219808	0.0021693	-0.0132662	-0.0155457	-3.36486e-05
100119889-58-T/A	0.00573028	0.00571657	-0.00239753	-0.00281436	-1.6082e-05
100120309-58-C/T	0.00219808	0.0021693	-0.0132662	-0.0155457	-3.36486e-05
100120583-58-T/C	0.0030137	0.00298155	-0.0107844	-0.0126426	-3.76268e-05
100120892-58-C/T	0.0030137	0.00298155	-0.0107844	-0.0126426	-3.76268e-05
100124416-58-C/T	0.00219808	0.0021693	-0.0132662	-0.0155457	-3.36486e-05
100159007-58-T/C	0.0160239	0.0160517	0.00172659	0.00204657	3.28603e-05
100184671-58-G/A	0.0116741	0.0118718	0.0166511	0.0196013	0.000233349
100185152-58-T/C	0.00596396	0.00595404	-0.00166712	-0.00195718	-1.16499e-05
100185657-58-G/A	0.00573028	0.00571657	-0.00239753	-0.00281436	-1.6082e-05
100191013-58-A/G	0.189821	0.21454	0.115221	0.162794	0.0355966
100202758-58-G/A	0.0379361	0.0413793	0.0832112	0.0995274	0.00417549
100120536-57-A/G	0.00219808	0.0021693	-0.0132662	-0.0155457	-3.36486e-05
100120843-57-G/A	0.00219808	0.0021693	-0.0132662	-0.0155457	-3.36486e-05
100122190-57-G/A	0.0108122	0.0109637	0.0138256	0.0162687	0.000178777
100123585-57-C/T	0.0030137	0.00298155	-0.0107844	-0.0126426	-3.76268e-05
100123591-57-C/A	0.00219808	0.0021693	-0.0132662	-0.0155457	-3.36486e-05
100127501-57-T/C	0.0030137	0.00298155	-0.0107844	-0.0126426	-3.76268e-05
100172750-57-T/G	0.00219808	0.0021693	-0.0132662	-0.0155457	-3.36486e-05
100197121-57-C/A	0.145722	0.153203	0.0488294	0.0661468	0.0102164
100198675-57-C/T	0.00573028	0.00571657	-0.00239753	-0.00281436	-1.6082e-05
100211897-57-A/G	0.202311	0.293455	0.31059	0.431898	0.133303
100219532-57-T/C	0.330704	0.406996	0.187451	0.316852	0.132986
100121259-56-T/C	0.00219808	0.0021693	-0.0132662	-0.0155457	-3.36486e-05
100121273-56-C/T	0.00749124	0.00751486	0.00314263	0.00369214	2.77605e-05
100121407-56-A/G	0.0042362	0.00420661	-0.00703361	-0.00825046	-3.46658e-05
100121711-56-A/G	0.00749124	0.00751486	0.00314263	0.00369214	2.77605e-05
100123277-56-C/T	0.0116741	0.0118718	0.0166511	0.0196013	0.000233349
100123443-56-T/C	0.0116741	0.0118718	0.0166511	0.0196013	0.000233349
100123467-56-G/A	0.0030137	0.00298155	-0.0107844	-0.0126426	-3.76268e-05
100123858-56-C/T	0.125378	0.132828	0.0560878	0.0741231	0.00993764
100124950-56-A/T	0.0030137	0.00298155	-0.0107844	-0.0126426	-3.76268e-05
100125208-56-T/C	0.00521178	0.00514441	-0.0130967	-0.0153931	-7.90155e-05
100125533-56-T/C	0.0132215	0.0131885	-0.00250626	-0.00296439	-3.90794e-05
100149888-56-A/G	0.0181885	0.0181859	-0.000138953	-0.000165119	-3.00277e-06
100183079-56-A/G	0.0030137	0.00298155	-0.0107844	-0.0126426	-3.76268e-05
100203422-56-A/T	0.20716	0.50062	0.586194	0.785813	0.431828
100215859-56-A/G	0.121177	0.208905	0.419943	0.521021	0.116462
100225123-56-C/T	0.160876	0.411737	0.609276	0.76901	0.348782
100227555-56-C/T	0.00219808	0.0021693	-0.0132662	-0.0155457	-3.36486e-05
100121818-55-C/G	0.203809	0.256579	0.205669	0.291381	0.077325
100123491-55-A/G	0.0042362	0.00420661	-0.00703361	-0.00825046	-3.46658e-05
100158219-55-T/G	0.00219808	0.0021693	-0.0132662	-0.0155457	-3.36486e-05
100190756-55-T/G	0.00219808	0.0021693	-0.0132662	-0.0155457	-3.36486e-05
100208440-55-C/T	0.0108122	0.0109637	0.0138256	0.0162687	0.000178777
100211331-55-C/A	0.00573028	0.00571657	-0.00239753	-0.00281436	-1.6082e-05
100217689-55-A/T	0.0030137	0.00298155	-0.0107844	-0.0126426	-3.76268e-05
100218746-55-T/A	0.0464048	0.0511394	0.0925821	0.111547	0.00579249
100220696-55-A/T	0.258761	0.498808	0.481241	0.701203	0.377819
100222885-55-C/A	0.0171906	0.0172857	0.00550232	0.00652567	0.000112904
100222937-55-G/T	0.13641	0.169058	0.193119	0.252759	0.0441062
100229700-55-T/C	0.125753	0.162605	0.226636	0.291434	0.0491787
100123868-54-A/T	0.00219808	0.0021693	-0.0132662	-0.0155457	-3.36486e-05
100123925-54-C/T	0.00219808	0.0021693	-0.0132662	-0.0155457	-3.36486e-05
100124736-54-A/G	0.00573028	0.00571657	-0.00239753	-0.00281436	-1.6082e-05
100157108-54-T/A	0.00596396	0.00595404	-0.00166712	-0.00195718	-1.16499e-05
100182177-54-G/C	0.125224	0.176136	0.289048	0.367778	0.0678996
100197414-54-G/A	0.00596396	0.00595404	-0.00166712	-0.00195718	-1.16499e-05
100121193-53-G/C	0.0116741	0.0118718	0.0166511	0.0196013	0.000233349
100122420-53-C/A	0.0042362	0.00420661	-0.00703361	-0.00825046	-3.46658e-05
100126230-53-A/T	0.00219808	0.0021693	-0.0132662	-0.0155457	-3.36486e-05
100127048-53-A/G	0.00219808	0.0021693	-0.0132662	-0.0155457	-3.36486e-05
100149302-53-A/G	0.0237923	0.0236733	-0.00502933	-0.0060156	-0.00014229
100156130-53-C/A	0.0042362	0.00420661	-0.00703361	-0.00825046	-3.46658e-05
100160884-53-G/T	0.0030137	0.00298155	-0.0107844	-0.0126426	-3.76268e-05
100190026-53-T/G	0.0043626	0.0043338	-0.00664364	-0.00779351	-3.37381e-05
100192381-53-G/A	0.00219808	0.0021693	-0.0132662	-0.0155457	-3.36486e-05
100208945-53-A/G	0.226133	0.393677	0.425588	0.599112	0.252586
100214475-53-G/T	0.0042362	0.00420661	-0.00703361	-0.00825046	-3.46658e-05
100215801-53-T/C	0.241242	0.500285	0.51779	0.732906	0.398304
100230742-53-C/T	0.0539721	0.0546186	0.0118366	0.0145685	0.000797282
100120805-52-T/C	0.0146878	0.0148179	0.00877944	0.0103802	0.000154038
100121172-52-A/G	0.0030137	0.00298155	-0.0107844	-0.0126426	-3.76268e-05
100121998-52-A/G	0.0030137	0.00298155	-0.0107844	-0.0126426	-3.76268e-05
100122084-52-G/A	0.00749124	0.00751486	0.00314263	0.00369214	2.77605e-05
100124606-52-T/C	0.0030137	0.00298155	-0.0107844	-0.0126426	-3.76268e-05
100127019-52-A/G	0.00968932	0.00966789	-0.00221727	-0.00261309	-2.52537e-05
100159104-52-G/A	0.0105049	0.010474	-0.00295161	-0.00348182	-3.64507e-05
100159894-52-G/A	0.00749124	0.00751486	0.00314263	0.00369214	2.77605e-05
100207040-52-A/G	0.00596396	0.00595404	-0.00166712	-0.00195718	-1.16499e-05
100232091-52-T/C	0.229552	0.500685	0.541524	0.752131	0.410569
100120199-51-T/C	0.0042362	0.00420661	-0.00703361	-0.00825046	-3.46658e-05
100121391-51-T/A	0.0042362	0.00420661	-0.00703361	-0.00825046	-3.46658e-05
100123002-51-A/G	0.00521178	0.00514441	-0.0130967	-0.0153931	-7.90155e-05
100123912-51-T/C	0.00219808	0.0021693	-0.0132662	-0.0155457	-3.36486e-05
100124592-51-T/C	0.0030137	0.00298155	-0.0107844	-0.0126426	-3.76268e-05
100125393-51-C/G	0.00749124	0.00751486	0.00314263	0.00369214	2.77605e-05
100125433-51-C/T	0.0042362	0.00420661	-0.00703361	-0.00825046	-3.46658e-05
100125609-51-G/A	0.0043626	0.0043338	-0.00664364	-0.00779351	-3.37381e-05
100127589-51-G/A	0.00573028	0.00571657	-0.00239753	-0.00281436	-1.6082e-05
100182944-51-C/T	0.01609	0.0159729	-0.00733071	-0.00870299	-0.000138843
100192051-51-A/G	0.00596396	0.00595404	-0.00166712	-0.00195718	-1.16499e-05
100205004-51-A/T	0.217919	0.280454	0.222977	0.320707	0.0932859
100223732-51-T/C	0.212242	0.239572	0.114078	0.165796	0.0404752
100122336-50-G/A	0.0042362	0.00420661	-0.00703361	-0.00825046	-3.46658e-05
100123680-50-T/C	0.0150484	0.0151242	0.00501319	0.00593312	8.98086e-05
100125015-50-A/T	0.0030137	0.00298155	-0.0107844	-0.0126426	-3.76268e-05
100126937-50-T/C	0.0146878	0.0148179	0.00877944	0.0103802	0.000154038
100128078-50-A/T	0.00219808	0.0021693	-0.0132662	-0.0155457	-3.36486e-05
100157035-50-C/A	0.0108122	0.0109637	0.0138256	0.0162687	0.000178777
100160461-50-C/T	0.0463282	0.0467436	0.00888704	0.0108558	0.000508192
100174936-50-G/T	0.00749124	0.00751486	0.00314263	0.00369214	2.77605e-05
100184332-50-T/G	0.0043626	0.0043338	-0.00664364	-0.00779351	-3.37381e-05
100191281-50-G/A	0.0030137	0.00298155	-0.0107844	-0.0126426	-3.76268e-05
100199006-50-G/A	0.237284	0.286828	0.172732	0.256821	0.0757842
100202750-50-A/C	0.00596396	0.00595404	-0.00166712	-0.00195718	-1.16499e-05
100203976-50-G/T	0.00573028	0.00571657	-0.00239753	-0.00281436	-1.6082e-05
100208540-50-T/C	0.0360659	0.0376013	0.0408318	0.0490854	0.00185823
100220080-50-G/A	0.00219808	0.0021693	-0.0132662	-0.0155457	-3.36486e-05
100229919-50-T/G	0.223623	0.473268	0.527491	0.728608	0.375142
100120913-49-T/C	0.00749124	0.00751486	0.00314263	0.00369214	2.77605e-05
100121927-49-G/A	0.0030137	0.00298155	-0.0107844	-0.0126426	-3.76268e-05
100122756-49-G/A	0.00573028	0.00571657	-0.00239753	-0.00281436	-1.6082e-05
100123732-49-C/T	0.0030137	0.00298155	-0.0107844	-0.0126426	-3.76268e-05
100124732-49-T/C	0.0042362	0.00420661	-0.00703361	-0.00825046	-3.46658e-05
100125783-49-T/C	0.0030137	0.00298155	-0.0107844	-0.0126426	-3.76268e-05
100174304-49-C/G	0.00219808	0.0021693	-0.0132662	-0.0155457	-3.36486e-05
100214984-49-G/C	0.055766	0.0630686	0.115788	0.140355	0.00902285
100220159-49-C/T	0.0128272	0.0128187	-0.00066254	-0.000783093	-1.00371e-05
100228518-49-C/A	0.00596396	0.00595404	-0.00166712	-0.00195718	-1.16499e-05
100120935-48-A/T	0.00573028	0.00571657	-0.00239753	-0.00281436	-1.6082e-05
100121015-48-C/T	0.0042362	0.00420661	-0.00703361	-0.00825046	-3.46658e-05
100121231-48-T/C	0.0117274	0.0116899	-0.00321327	-0.00379534	-4.43433e-05
100122494-48-G/A	0.00219808	0.0021693	-0.0132662	-0.0155457	-3.36486e-05
100123687-48-T/C	0.00996648	0.00989917	-0.00679884	-0.00802092	-7.93105e-05
100123819-48-G/A	0.0108122	0.0109637	0.0138256	0.0162687	0.000178777
100124301-48-C/T	0.0030137	0.00298155	-0.0107844	-0.0126426	-3.76268e-05
100124338-48-G/A	0.00596396	0.00595404	-0.00166712	-0.00195718	-1.16499e-05
100125686-48-A/G	0.0148675	0.0147624	-0.00712217	-0.00844463	-0.000124515
100156889-48-G/A	0.00219808	0.0021693	-0.0132662	-0.0155457	-3.36486e-05
100159051-48-G/A	0.00219808	0.0021693	-0.0132662	-0.0155457	-3.36486e-05
100185585-48-C/T	0.0030137	0.00298155	-0.0107844	-0.0126426	-3.76268e-05
100192341-48-T/G	0.177226	0.346845	0.489034	0.641175	0.240514
100198111-48-G/T	0.00749124	0.00751486	0.00314263	0.00369214	2.77605e-05
100200275-48-C/A	0.00219808	0.0021693	-0.0132662	-0.0155457	-3.36486e-05
100213615-48-T/C	0.0563347	0.060894	0.0748721	0.0914246	0.00563668
100217020-48-C/T	0.0518463	0.0558596	0.0718449	0.0873564	0.00493812
100218047-48-A/T	0.0275354	0.0297124	0.0732683	0.0868396	0.00261172
100218145-48-C/T	0.0043626	0.0043338	-0.00664364	-0.00779351	-3.37381e-05
100225360-48-G/A	0.174703	0.211051	0.172225	0.236669	0.0513831
100232009-48-C/T	0.19381	0.490575	0.604932	0.795242	0.429459
100121734-47-T/A	0.0042362	0.00420661	-0.00703361	-0.00825046	-3.46658e-05
100122595-47-T/C	0.0073763	0.00730247	-0.0101104	-0.0119031	-8.67757e-05
100123376-47-C/T	0.00573028	0.00571657	-0.00239753	-0.00281436	-1.6082e-05
100158475-47-A/G	0.0364088	0.0372821	0.0234245	0.0282509	0.00105737
100161143-47-C/T	0.0042362	0.00420661	-0.00703361	-0.00825046	-3.46658e-05
100174170-47-T/C	0.00596396	0.00595404	-0.00166712	-0.00195718	-1.16499e-05
100191421-47-T/C	0.0108122	0.0109637	0.0138256	0.0162687	0.000178777
100197860-47-C/A	0.0042362	0.00420661	-0.00703361	-0.00825046	-3.46658e-05
100198135-47-G/A	0.0030137	0.00298155	-0.0107844	-0.0126426	-3.76268e-05
100207616-47-G/T	0.344623	0.439162	0.215273	0.369943	0.168294
100126999-46-T/C	0.00749124	0.00751486	0.00314263	0.00369214	2.77605e-05
100158905-46-A/G	0.0108122	0.0109637	0.0138256	0.0162687	0.000178777
100160210-46-T/C	0.00219808	0.0021693	-0.0132662	-0.0155457	-3.36486e-05
100173422-46-T/A	0.234251	0.476679	0.508578	0.714303	0.369354
100185331-46-C/T	0.00859879	0.00852223	-0.00898462	-0.0105888	-9.01053e-05
100192035-46-A/G	0.186681	0.215461	0.133574	0.187433	0.0412834
100209580-46-C/T	0.0043626	0.0043338	-0.00664364	-0.00779351	-3.37381e-05
100226292-46-C/A	0.0183034	0.018396	0.00503222	0.00597538	0.000110015
100122298-45-T/C	0.00596396	0.00595404	-0.00166712	-0.00195718	-1.16499e-05
100123888-45-A/G	0.00219808	0.0021693	-0.0132662	-0.0155457	-3.36486e-05
100124654-45-C/G	0.0042362	0.00420661	-0.00703361	-0.00825046	-3.46658e-05
100124858-45-G/A	0.0042362	0.00420661	-0.00703361	-0.00825046	-3.46658e-05
100125621-45-C/T	0.0042362	0.00420661	-0.00703361	-0.00825046	-3.46658e-05
100156393-45-A/G	0.0607113	0.0673499	0.09857	0.120452	0.00824574
100160183-45-A/G	0.00792835	0.0078735	-0.00696672	-0.00820233	-6.4506e-05
100161058-45-T/C	0.00834595	0.00839516	0.00586214	0.00688999	5.78991e-05
100174201-45-G/T	0.00573028	0.00571657	-0.00239753	-0.00281436	-1.6082e-05
100174753-45-T/C	0.0030137	0.00298155	-0.0107844	-0.0126426	-3.76268e-05
100203604-45-A/C	0.107093	0.138844	0.228678	0.28782	0.0414852
100215668-45-G/A	0.253806	0.326496	0.222636	0.335636	0.11365
100220035-45-A/G	0.222801	0.29071	0.233598	0.337517	0.10194
100119501-44-A/C	0.00573028	0.00571657	-0.00239753	-0.00281436	-1.6082e-05
100119632-44-G/T	0.0030137	0.00298155	-0.0107844	-0.0126426	-3.76268e-05
100120666-44-A/G	0.00996648	0.00989917	-0.00679884	-0.00802092	-7.93105e-05
100120973-44-C/A	0.00219808	0.0021693	-0.0132662	-0.0155457	-3.36486e-05
100123923-44-T/G	0.00749124	0.00751486	0.00314263	0.00369214	2.77605e-05
100156569-44-C/T	0.00749124	0.00751486	0.00314263	0.00369214	2.77605e-05
100157670-44-G/C	0.0112267	0.0113997	0.0151815	0.0178676	0.000204202
100158232-44-A/C	0.0043626	0.0043338	-0.00664364	-0.00779351	-3.37381e-05
100183010-44-T/C	0.219904	0.303721	0.275968	0.394573	0.125352
100185353-44-T/A	0.055766	0.0630686	0.115788	0.140355	0.00902285
100198569-44-T/A	0.00596396	0.00595404	-0.00166712	-0.00195718	-1.16499e-05
100121057-43-A/C	0.00749124	0.00751486	0.00314263	0.00369214	2.77605e-05
100121894-43-C/T	0.0116741	0.0118718	0.0166511	0.0196013	0.000233349
100122635-43-T/A	0.0030137	0.00298155	-0.0107844	-0.0126426	-3.76268e-05
100122844-43-T/C	0.0174044	0.0175204	0.00661776	0.00784882	0.000137666
100160697-43-A/G	0.00219808	0.0021693	-0.0132662	-0.0155457	-3.36486e-05
100191577-43-C/T	0.031977	0.0351804	0.0910565	0.108101	0.00386076
100193103-43-T/C	0.0116741	0.0118718	0.0166511	0.0196013	0.000233349
100203333-43-G/T	0.00219808	0.0021693	-0.0132662	-0.0155457	-3.36486e-05
100217708-43-G/C	0.342039	0.445714	0.232604	0.39705	0.183831
100123753-42-G/A	0.0108122	0.0109637	0.0138256	0.0162687	0.000178777
100123963-42-G/A	0.00521178	0.00514441	-0.0130967	-0.0153931	-7.90155e-05
100124575-42-C/G	0.0317716	0.0337926	0.0598066	0.0713527	0.00243523
100125189-42-C/T	0.00573028	0.00571657	-0.00239753	-0.00281436	-1.6082e-05
100161441-42-T/C	0.0116741	0.0118718	0.0166511	0.0196013	0.000233349
100175023-42-C/T	0.00521178	0.00514441	-0.0130967	-0.0153931	-7.90155e-05
100207518-42-C/A	0.00573028	0.00571657	-0.00239753	-0.00281436	-1.6082e-05
100211557-42-A/C	0.00749124	0.00751486	0.00314263	0.00369214	2.77605e-05
100217668-42-C/G	0.0042362	0.00420661	-0.00703361	-0.00825046	-3.46658e-05
100221863-42-A/G	0.256892	0.336195	0.235882	0.356323	0.124503
100221999-42-G/T	0.00219808	0.0021693	-0.0132662	-0.0155457	-3.36486e-05
100119560-41-G/A	0.0030137	0.00298155	-0.0107844	-0.0126426	-3.76268e-05
100122921-41-A/T	0.0042362	0.00420661	-0.00703361	-0.00825046	-3.46658e-05
100159007-41-G/A	0.0030137	0.00298155	-0.0107844	-0.0126426	-3.76268e-05
100183315-41-C/A	0.0369107	0.0382124	0.0340663	0.0410343	0.00157692
100183769-41-G/A	0.0030137	0.00298155	-0.0107844	-0.0126426	-3.76268e-05
100198002-41-C/A	0.0350482	0.0361236	0.0297711	0.0358168	0.00130025
100205004-41-A/G	0.0116741	0.0118718	0.0166511	0.0196013	0.000233349
100120109-40-T/C	0.169299	0.259527	0.347664	0.461529	0.12672
100120846-40-C/A	0.00996648	0.00989917	-0.00679884	-0.00802092	-7.93105e-05
100121427-40-C/T	0.0116741	0.0118718	0.0166511	0.0196013	0.000233349
100121447-40-T/C	0.0146878	0.0148179	0.00877944	0.0103802	0.000154038
100121581-40-C/A	0.00219808	0.0021693	-0.0132662	-0.0155457	-3.36486e-05
100123685-40-T/C	0.0030137	0.00298155	-0.0107844	-0.0126426	-3.76268e-05
100123797-40-C/T	0.0030137	0.00298155	-0.0107844	-0.0126426	-3.76268e-05
100126531-40-G/A	0.0116741	0.0118718	0.0166511	0.0196013	0.000233349
100156622-40-A/G	0.00219808	0.0021693	-0.0132662	-0.0155457	-3.36486e-05
100171595-40-A/C	0.0116741	0.0118718	0.0166511	0.0196013	0.000233349
100193329-40-T/G	0.21581	0.253502	0.148687	0.215858	0.0560764
100198639-40-T/A	0.0030137	0.00298155	-0.0107844	-0.0126426	-3.76268e-05
100232045-40-C/T	0.260611	0.335078	0.222237	0.338139	0.1175
100120929-39-A/G	0.00521178	0.00514441	-0.0130967	-0.0153931	-7.90155e-05
100123431-39-G/A	0.0030137	0.00298155	-0.0107844	-0.0126426	-3.76268e-05
100127738-39-T/C	0.0042362	0.00420661	-0.00703361	-0.00825046	-3.46658e-05
100158712-39-G/A	0.0116741	0.0118718	0.0166511	0.0196013	0.000233349
100175752-39-T/C	0.00643428	0.00636682	-0.0105956	-0.0124636	-7.92136e-05
100181956-39-C/A	0.00219808	0.0021693	-0.0132662	-0.0155457	-3.36486e-05
100221483-39-T/C	0.277685	0.493185	0.436955	0.657851	0.34807
100225309-39-C/T	0.0207594	0.0218039	0.0479073	0.0566246	0.0012445
100227687-39-C/T	0.272797	0.499093	0.453414	0.676313	0.363051
100228600-39-A/T	0.241313	0.288048	0.162248	0.242927	0.071867
100230052-39-G/A	0.0912852	0.0903362	-0.0105053	-0.013511	-0.0012184
100121619-38-A/G	0.0030137	0.00298155	-0.0107844	-0.0126426	-3.76268e-05
100124049-38-C/T	0.0108122	0.0109637	0.0138256	0.0162687	0.000178777
100125527-38-A/T	0.00573028	0.00571657	-0.00239753	-0.00281436	-1.6082e-05
100126545-38-G/T	0.00219808	0.0021693	-0.0132662	-0.0155457	-3.36486e-05
100161461-38-G/A	0.0030137	0.00298155	-0.0107844	-0.0126426	-3.76268e-05
100173976-38-A/T	0.00749124	0.00751486	0.00314263	0.00369214	2.77605e-05
100175352-38-G/C	0.193846	0.468325	0.586086	0.772705	0.397226
100201712-38-A/G	0.0807371	0.111296	0.274575	0.333223	0.0387836
100205992-38-C/G	0.220034	0.473526	0.535328	0.735149	0.379171
100119989-37-C/T	0.00749124	0.00751486	0.00314263	0.00369214	2.77605e-05
100159100-37-G/A	0.0145776	0.0149719	0.0263372	0.031045	0.000466843
100190725-37-C/T	0.00596396	0.00595404	-0.00166712	-0.00195718	-1.16499e-05
100207387-37-G/T	0.0030137	0.00298155	-0.0107844	-0.0126426	-3.76268e-05
100209392-37-G/T	0.00596396	0.00595404	-0.00166712	-0.00195718	-1.16499e-05
100221224-37-G/C	0.0112267	0.0113997	0.0151815	0.0178676	0.000204202
100119531-36-A/T	0.00219808	0.0021693	-0.0132662	-0.0155457	-3.36486e-05
100121952-36-C/T	0.00219808	0.0021693	-0.0132662	-0.0155457	-3.36486e-05
100123410-36-G/C	0.0030137	0.00298155	-0.0107844	-0.0126426	-3.76268e-05
100126835-36-T/C	0.00749124	0.00751486	0.00314263	0.00369214	2.77605e-05
100156187-36-G/T	0.0337755	0.0357079	0.0541162	0.0647584	0.00233324
100160727-36-T/C	0.00219808	0.0021693	-0.0132662	-0.0155457	-3.36486e-05
100175159-36-T/G	0.00219808	0.0021693	-0.0132662	-0.0155457	-3.36486e-05
100198967-36-G/A	0.287419	0.436844	0.342056	0.529823	0.244645
100208362-36-T/C	0.0112267	0.0113997	0.0151815	0.0178676	0.000204202
100225761-36-A/G	0.236042	0.470718	0.49855	0.702944	0.358383
100121107-35-T/A	0.0108122	0.0109637	0.0138256	0.0162687	0.000178777
100121175-35-C/T	0.00573028	0.00571657	-0.00239753	-0.00281436	-1.6082e-05
100122006-35-C/T	0.0072499	0.00717566	-0.0103471	-0.0121807	-8.72541e-05
100123304-35-C/T	0.0030137	0.00298155	-0.0107844	-0.0126426	-3.76268e-05
100125235-35-G/T	0.0042362	0.00420661	-0.00703361	-0.00825046	-3.46658e-05
100127883-35-C/T	0.0042362	0.00420661	-0.00703361	-0.00825046	-3.46658e-05
100185163-35-G/C	0.0145776	0.0149719	0.0263372	0.031045	0.000466843
100199141-35-C/A	0.0042362	0.00420661	-0.00703361	-0.00825046	-3.46658e-05
100202443-35-G/C	0.0145776	0.0149719	0.0263372	0.031045	0.000466843
100207544-35-G/A	0.100134	0.119001	0.158543	0.200258	0.0244607
100217423-35-A/C	0.216505	0.466577	0.535972	0.732645	0.372372
100120088-34-T/A	0.00219808	0.0021693	-0.0132662	-0.0155457	-3.36486e-05
100123913-34-G/A	0.0072499	0.00717566	-0.0103471	-0.0121807	-8.72541e-05
100125517-34-G/C	0.0042362	0.00420661	-0.00703361	-0.00825046	-3.46658e-05
100162937-34-T/G	0.0030137	0.00298155	-0.0107844	-0.0126426	-3.76268e-05
100171375-34-T/A	0.0100929	0.0100256	-0.00670631	-0.00791265	-7.92406e-05
100173221-34-C/T	0.00944798	0.00932942	-0.0127084	-0.0149996	-0.000139641
100190369-34-G/T	0.0116741	0.0118718	0.0166511	0.0196013	0.000233349
100197878-34-G/A	0.00219808	0.0021693	-0.0132662	-0.0155457	-3.36486e-05
100208787-34-A/C	0.24991	0.482485	0.482036	0.693989	0.36174
100119757-33-G/A	0.00521178	0.00514441	-0.0130967	-0.0153931	-7.90155e-05
100121416-33-A/G	0.00596396	0.00595404	-0.00166712	-0.00195718	-1.16499e-05
100122522-33-G/T	0.00219808	0.0021693	-0.0132662	-0.0155457	-3.36486e-05
100123805-33-C/A	0.00219808	0.0021693	-0.0132662	-0.0155457	-3.36486e-05
100124859-33-G/T	0.0108122	0.0109637	0.0138256	0.0162687	0.000178777
100126691-33-G/A	0.00749124	0.00751486	0.00314263	0.00369214	2.77605e-05
100157695-33-G/A	0.0030137	0.00298155	-0.0107844	-0.0126426	-3.76268e-05
100159214-33-C/A	0.00219808	0.0021693	-0.0132662	-0.0155457	-3.36486e-05
100163019-33-A/C	0.0730903	0.13289	0.449996	0.526878	0.0752683
100163132-33-G/A	0.0224863	0.0227047	0.00962077	0.0114641	0.000260706
100172847-33-T/A	0.00573028	0.00571657	-0.00239753	-0.00281436	-1.6082e-05
100174461-33-C/T	0.0176381	0.017755	0.00658353	0.00781013	0.000138821
100175533-33-T/C	0.00219808	0.0021693	-0.0132662	-0.0155457	-3.36486e-05
100185732-33-G/A	0.0145776	0.0149719	0.0263372	0.031045	0.000466843
100196935-33-G/A	0.0030137	0.00298155	-0.0107844	-0.0126426	-3.76268e-05
100199699-33-G/T	0.0108122	0.0109637	0.0138256	0.0162687	0.000178777
100214360-33-A/C	0.00834595	0.00839516	0.00586214	0.00688999	5.78991e-05
100119855-32-C/T	0.0108122	0.0109637	0.0138256	0.0162687	0.000178777
100120877-32-C/T	0.00749124	0.00751486	0.00314263	0.00369214	2.77605e-05
100122046-32-G/A	0.00219808	0.0021693	-0.0132662	-0.0155457	-3.36486e-05
100124593-32-T/A	0.00219808	0.0021693	-0.0132662	-0.0155457	-3.36486e-05
100125465-32-C/A	0.00219808	0.0021693	-0.0132662	-0.0155457	-3.36486e-05
100126592-32-A/G	0.0108122	0.0109637	0.0138256	0.0162687	0.000178777
100196881-32-T/A	0.150397	0.415222	0.637792	0.791657	0.363656
100199898-32-C/A	0.00219808	0.0021693	-0.0132662	-0.0155457	-3.36486e-05
100212180-32-G/A	0.182723	0.357772	0.489275	0.645781	0.249883
100229352-32-T/C	0.0043626	0.0043338	-0.00664364	-0.00779351	-3.37381e-05
100230327-32-T/G	0.00596396	0.00595404	-0.00166712	-0.00195718	-1.16499e-05
100124256-31-A/G	0.00219808	0.0021693	-0.0132662	-0.0155457	-3.36486e-05
100156195-31-A/T	0.150397	0.415222	0.637792	0.791657	0.363656
100157095-31-C/T	0.00573028	0.00571657	-0.00239753	-0.00281436	-1.6082e-05
100159854-31-G/C	0.0134247	0.0135443	0.00882655	0.0104224	0.000141372
100161034-31-G/C	0.00596396	0.00595404	-0.00166712	-0.00195718	-1.16499e-05
100173739-31-G/C	0.00219808	0.0021693	-0.0132662	-0.0155457	-3.36486e-05
100182814-31-A/T	0.279256	0.36241	0.229448	0.357727	0.134601
100184887-31-A/T	0.0116741	0.0118718	0.0166511	0.0196013	0.000233349
100199606-31-C/A	0.115073	0.13662	0.15772	0.202608	0.028408
100202745-31-C/G	0.16935	0.20715	0.182478	0.24873	0.0530915
100208718-31-A/G	0.198763	0.231354	0.14087	0.200413	0.0474548
100216343-31-T/C	0.00573028	0.00571657	-0.00239753	-0.00281436	-1.6082e-05
100121404-30-T/C	0.0042362	0.00420661	-0.00703361	-0.00825046	-3.46658e-05
100122110-30-T/G	0.00573028	0.00571657	-0.00239753	-0.00281436	-1.6082e-05
100124661-30-G/A	0.00219808	0.0021693	-0.0132662	-0.0155457	-3.36486e-05
100156743-30-T/A	0.00573028	0.00571657	-0.00239753	-0.00281436	-1.6082e-05
100157353-30-C/T	0.00749124	0.00751486	0.00314263	0.00369214	2.77605e-05
100157971-30-G/A	0.0223331	0.0235986	0.0536251	0.0634249	0.00151012
100158673-30-C/A	0.00219808	0.0021693	-0.0132662	-0.0155457	-3.36486e-05
100159626-30-T/C	0.0116741	0.0118718	0.0166511	0.0196013	0.000233349
100168414-30-C/T	0.0043626	0.0043338	-0.00664364	-0.00779351	-3.37381e-05
100193507-30-C/A	0.02215	0.0225721	0.0186964	0.0222373	0.000503505
100120146-29-T/C	0.0043626	0.0043338	-0.00664364	-0.00779351	-3.37381e-05
100121018-29-G/A	0.00219808	0.0021693	-0.0132662	-0.0155457	-3.36486e-05
100122634-29-A/G	0.0030137	0.00298155	-0.0107844	-0.0126426	-3.76268e-05
100126167-29-T/A	0.00219808	0.0021693	-0.0132662	-0.0155457	-3.36486e-05
100126658-29-G/A	0.00219808	0.0021693	-0.0132662	-0.0155457	-3.36486e-05
100172234-29-A/T	0.0373748	0.0391344	0.0449613	0.0540862	0.00213249
100196235-29-A/T	0.195603	0.345782	0.434316	0.587396	0.217813
100223632-29-T/A	0.269431	0.360132	0.251854	0.385991	0.144843
100225479-29-G/T	0.284813	0.369113	0.228387	0.3589	0.137517
100226928-29-G/A	0.0580114	0.0647099	0.103517	0.126032	0.00829625
100120604-28-C/T	0.0108122	0.0109637	0.0138256	0.0162687	0.000178777
100120814-28-C/T	0.00573028	0.00571657	-0.00239753	-0.00281436	-1.6082e-05
100121393-28-C/G	0.50928	0.501168	-0.0161866	-0.038587	-0.0192864
100156428-28-C/A	0.00219808	0.0021693	-0.0132662	-0.0155457	-3.36486e-05
100161700-28-G/A	0.010544	0.0105463	0.000212983	0.000251119	2.64846e-06
100175892-28-A/G	0.00219808	0.0021693	-0.0132662	-0.0155457	-3.36486e-05
100191964-28-T/C	0.00219808	0.0021693	-0.0132662	-0.0155457	-3.36486e-05
100203383-28-C/T	0.0116741	0.0118718	0.0166511	0.0196013	0.000233349
100119682-27-T/C	0.00219808	0.0021693	-0.0132662	-0.0155457	-3.36486e-05
100120077-27-C/G	0.00573028	0.00571657	-0.00239753	-0.00281436	-1.6082e-05
100121436-27-C/G	0.0030137	0.00298155	-0.0107844	-0.0126426	-3.76268e-05
100122641-27-C/T	0.0108122	0.0109637	0.0138256	0.0162687	0.000178777
100125391-27-A/T	0.0030137	0.00298155	-0.0107844	-0.0126426	-3.76268e-05
100125455-27-T/C	0.00996648	0.00989917	-0.00679884	-0.00802092	-7.93105e-05
100175553-27-A/G	0.0145776	0.0149719	0.0263372	0.031045	0.000466843
100183102-27-C/A	0.00219808	0.0021693	-0.0132662	-0.0155457	-3.36486e-05
100202915-27-C/T	0.0331521	0.03403	0.0257975	0.0309958	0.00105932
100209149-27-G/A	0.31154	0.474005	0.34275	0.549439	0.275314
100222303-27-T/C	0.294816	0.441301	0.331939	0.520376	0.242347
100225774-27-A/T	0.204146	0.500575	0.592178	0.79011	0.434545
100120065-26-G/A	0.00219808	0.0021693	-0.0132662	-0.0155457	-3.36486e-05
100120145-26-A/G	0.0109421	0.0108316	-0.0101975	-0.0120492	-0.000130291
100120548-26-C/T	0.00219808	0.0021693	-0.0132662	-0.0155457	-3.36486e-05
100122368-26-T/C	0.0042362	0.00420661	-0.00703361	-0.00825046	-3.46658e-05
100122516-26-T/C	0.00944798	0.00932942	-0.0127084	-0.0149996	-0.000139641
100124326-26-G/T	0.0030137	0.00298155	-0.0107844	-0.0126426	-3.76268e-05
100184055-26-G/A	0.00219808	0.0021693	-0.0132662	-0.0155457	-3.36486e-05
100184225-26-A/G	0.227015	0.471923	0.518958	0.72091	0.36964
100185620-26-A/G	0.0971966	0.160953	0.396119	0.480191	0.0823908
100192126-26-T/A	0.090724	0.201298	0.549305	0.645685	0.141874
100205110-26-G/C	0.0145776	0.0149719	0.0263372	0.031045	0.000466843
100210660-26-C/T	0.207309	0.500614	0.58589	0.78559	0.43168
100223215-26-T/C	0.0771641	0.079674	0.0315013	0.0396166	0.00317298
100226993-26-C/G	0.343568	0.447126	0.231609	0.396335	0.184053
100228389-26-C/T	0.191701	0.449842	0.573848	0.755968	0.372591
100119469-25-G/A	0.0042362	0.00420661	-0.00703361	-0.00825046	-3.46658e-05
100122685-25-T/A	0.00749124	0.00751486	0.00314263	0.00369214	2.77605e-05
100156394-25-G/T	0.00219808	0.0021693	-0.0132662	-0.0155457	-3.36486e-05
100180356-25-C/G	0.00596396	0.00595404	-0.00166712	-0.00195718	-1.16499e-05
100183775-25-C/T	0.0207594	0.0218039	0.0479073	0.0566246	0.0012445
100212743-25-A/G	0.0042362	0.00420661	-0.00703361	-0.00825046	-3.46658e-05
100120948-24-T/G	0.216599	0.275957	0.215097	0.309243	0.088397
100124099-24-A/G	0.0043626	0.0043338	-0.00664364	-0.00779351	-3.37381e-05
100124709-24-A/T	0.00219808	0.0021693	-0.0132662	-0.0155457	-3.36486e-05
100127392-24-A/T	0.0030137	0.00298155	-0.0107844	-0.0126426	-3.76268e-05
100156521-24-A/T	0.0042362	0.00420661	-0.00703361	-0.00825046	-3.46658e-05
100157794-24-A/G	0.0030137	0.00298155	-0.0107844	-0.0126426	-3.76268e-05
100158454-24-C/T	0.0043626	0.0043338	-0.00664364	-0.00779351	-3.37381e-05
100182875-24-G/C	0.225918	0.286912	0.212588	0.30944	0.0919278
100184499-24-T/C	0.168838	0.232147	0.272713	0.366153	0.0888647
100217341-24-C/A	0.0043626	0.0043338	-0.00664364	-0.00779351	-3.37381e-05
100218144-24-A/T	0.00219808	0.0021693	-0.0132662	-0.0155457	-3.36486e-05
100119969-23-A/G	0.0190504	0.0190873	0.00193224	0.00229731	4.38637e-05
100122470-23-G/A	0.0108122	0.0109637	0.0138256	0.0162687	0.000178777
100123035-23-A/T	0.0042362	0.00420661	-0.00703361	-0.00825046	-3.46658e-05
100123727-23-C/T	0.00219808	0.0021693	-0.0132662	-0.0155457	-3.36486e-05
100127707-23-T/C	0.00219808	0.0021693	-0.0132662	-0.0155457	-3.36486e-05
100156838-23-C/T	0.0130102	0.0131093	0.00755316	0.00891696	0.000117042
100158018-23-C/T	0.00219808	0.0021693	-0.0132662	-0.0155457	-3.36486e-05
100160331-23-C/T	0.0112267	0.0113997	0.0151815	0.0178676	0.000204202
100160463-23-A/G	0.00219808	0.0021693	-0.0132662	-0.0155457	-3.36486e-05
100169322-23-G/C	0.00749124	0.00751486	0.00314263	0.00369214	2.77605e-05
100203228-23-T/C	0.189779	0.443638	0.57222	0.752221	0.36554
100212775-23-C/G	0.0030137	0.00298155	-0.0107844	-0.0126426	-3.76268e-05
100213651-23-C/T	0.0350482	0.0361236	0.0297711	0.0358168	0.00130025
100119875-22-G/T	0.00596396	0.00595404	-0.00166712	-0.00195718	-1.16499e-05
100120116-22-T/C	0.0042362	0.00420661	-0.00703361	-0.00825046	-3.46658e-05
100120435-22-T/C	0.0030137	0.00298155	-0.0107844	-0.0126426	-3.76268e-05
100121120-22-A/G	0.0189742	0.018985	0.000568637	0.000676177	1.28384e-05
100122163-22-G/C	0.00219808	0.0021693	-0.0132662	-0.0155457	-3.36486e-05
100122561-22-C/T	0.0116741	0.0118718	0.0166511	0.0196013	0.000233349
100123089-22-A/G	0.0146878	0.0148179	0.00877944	0.0103802	0.000154038
100123634-22-C/T	0.0072499	0.00717566	-0.0103471	-0.0121807	-8.72541e-05
100125116-22-T/A	0.00219808	0.0021693	-0.0132662	-0.0155457	-3.36486e-05
100125210-22-C/T	0.234597	0.28981	0.190512	0.281452	0.0841573
100174104-22-C/A	0.0042362	0.00420661	-0.00703361	-0.00825046	-3.46658e-05
100175364-22-T/A	0.214219	0.50063	0.572102	0.775471	0.425242
100184089-22-C/A	0.0042362	0.00420661	-0.00703361	-0.00825046	-3.46658e-05
100190461-22-G/A	0.00573028	0.00571657	-0.00239753	-0.00281436	-1.6082e-05
100193331-22-C/A	0.00859096	0.00864843	0.00664548	0.00781159	6.76328e-05
100195146-22-G/A	0.00219808	0.0021693	-0.0132662	-0.0155457	-3.36486e-05
100122032-21-A/G	0.00573028	0.00571657	-0.00239753	-0.00281436	-1.6082e-05
100122558-21-T/G	0.0030137	0.00298155	-0.0107844	-0.0126426	-3.76268e-05
100122579-21-C/A	0.0042362	0.00420661	-0.00703361	-0.00825046	-3.46658e-05
100126838-21-T/C	0.0030137	0.00298155	-0.0107844	-0.0126426	-3.76268e-05
100156974-21-T/G	0.0042362	0.00420661	-0.00703361	-0.00825046	-3.46658e-05
100157498-21-C/A	0.0042362	0.00420661	-0.00703361	-0.00825046	-3.46658e-05
100171024-21-G/C	0.055766	0.0630686	0.115788	0.140355	0.00902285
100173071-21-G/A	0.00573028	0.00571657	-0.00239753	-0.00281436	-1.6082e-05
100192305-21-C/A	0.0108122	0.0109637	0.0138256	0.0162687	0.000178777
100193045-21-T/C	0.220777	0.430925	0.487668	0.675261	0.314638
100207994-21-A/T	0.0645041	0.0661331	0.0246316	0.0305927	0.0020315
100226804-21-G/A	0.191286	0.463569	0.587363	0.771788	0.392801
100227354-21-G/A	0.0608952	0.0630996	0.0349344	0.0431484	0.0027385
100229754-21-A/G	0.179601	0.486659	0.630951	0.811882	0.436659
100120718-20-C/T	0.0030137	0.00298155	-0.0107844	-0.0126426	-3.76268e-05
100122732-20-A/G	0.00573028	0.00571657	-0.00239753	-0.00281436	-1.6082e-05
100123666-20-C/A	0.00219808	0.0021693	-0.0132662	-0.0155457	-3.36486e-05
100123717-20-T/A	0.00573028	0.00571657	-0.00239753	-0.00281436	-1.6082e-05
100123951-20-A/G	0.00968932	0.00966789	-0.00221727	-0.00261309	-2.52537e-05
100124680-20-C/A	0.0042362	0.00420661	-0.00703361	-0.00825046	-3.46658e-05
100127681-20-A/T	0.00573028	0.00571657	-0.00239753	-0.00281436	-1.6082e-05
100173056-20-A/T	0.0112267	0.0113997	0.0151815	0.0178676	0.000204202
100180388-20-C/G	0.00219808	0.0021693	-0.0132662	-0.0155457	-3.36486e-05
100183754-20-A/G	0.0121646	0.012047	-0.00975714	-0.0115423	-0.000138824
100193080-20-G/C	0.00596396	0.00595404	-0.00166712	-0.00195718	-1.16499e-05
100195964-20-A/T	0.0784556	0.0874877	0.103239	0.128489	0.0114346
100198945-20-C/A	0.00219808	0.0021693	-0.0132662	-0.0155457	-3.36486e-05
100205033-20-C/G	0.00219808	0.0021693	-0.0132662	-0.0155457	-3.36486e-05
100206055-20-G/C	0.215092	0.276957	0.223374	0.3201	0.0919543
100218207-20-T/A	0.00596396	0.00595404	-0.00166712	-0.00195718	-1.16499e-05
100120140-19-T/C	0.0042362	0.00420661	-0.00703361	-0.00825046	-3.46658e-05
100121803-19-A/G	0.0072499	0.00717566	-0.0103471	-0.0121807	-8.72541e-05
100122846-19-C/A	0.154552	0.173352	0.108447	0.146994	0.0259422
100124006-19-A/G	0.00521178	0.00514441	-0.0130967	-0.0153931	-7.90155e-05
100157284-19-A/G	0.0042362	0.00420661	-0.00703361	-0.00825046	-3.46658e-05
100158508-19-A/C	0.00219808	0.0021693	-0.0132662	-0.0155457	-3.36486e-05
100191410-19-G/A	0.217191	0.500688	0.566216	0.771097	0.422513
100204911-19-C/T	0.0030137	0.00298155	-0.0107844	-0.0126426	-3.76268e-05
100207546-19-A/T	0.0340804	0.0346493	0.0164191	0.0197774	0.000687149
100207575-19-G/T	0.228561	0.4879	0.531542	0.738445	0.392206
100208027-19-G/T	0.0116741	0.0118718	0.0166511	0.0196013	0.000233349
100224264-19-C/T	0.276679	0.498069	0.444496	0.667492	0.357087
100226926-19-T/C	0.0207594	0.0218039	0.0479073	0.0566246	0.0012445
100232369-19-G/A	0.0780165	0.0793521	0.0168314	0.0212387	0.00169006
100120310-18-A/G	0.0030137	0.00298155	-0.0107844	-0.0126426	-3.76268e-05
100121959-18-T/A	0.0108122	0.0109637	0.0138256	0.0162687	0.000178777
100156533-18-T/A	0.00596396	0.00595404	-0.00166712	-0.00195718	-1.16499e-05
100156638-18-A/G	0.00219808	0.0021693	-0.0132662	-0.0155457	-3.36486e-05
100158066-18-C/T	0.0042362	0.00420661	-0.00703361	-0.00825046	-3.46658e-05
100198603-18-A/T	0.0030137	0.00298155	-0.0107844	-0.0126426	-3.76268e-05
100122035-17-C/A	0.0030137	0.00298155	-0.0107844	-0.0126426	-3.76268e-05
100124153-17-A/G	0.0108122	0.0109637	0.0138256	0.0162687	0.000178777
100159232-17-C/T	0.00219808	0.0021693	-0.0132662	-0.0155457	-3.36486e-05
100159762-17-C/T	0.0108122	0.0109637	0.0138256	0.0162687	0.000178777
100173156-17-A/C	0.00219808	0.0021693	-0.0132662	-0.0155457	-3.36486e-05
100173485-17-A/T	0.0116741	0.0118718	0.0166511	0.0196013	0.000233349
100175121-17-T/G	0.201233	0.249183	0.19243	0.272327	0.0700355
100207837-17-A/G	0.173548	0.276437	0.372197	0.494725	0.145244
100211112-17-C/A	0.0350482	0.0361236	0.0297711	0.0358168	0.00130025
100231633-17-G/C	0.0215178	0.0226658	0.0506505	0.0598862	0.00136883
100119712-16-A/G	0.0072499	0.00717566	-0.0103471	-0.0121807	-8.72541e-05
100124018-16-G/T	0.0108122	0.0109637	0.0138256	0.0162687	0.000178777
100124139-16-C/T	0.018924	0.018962	0.00200298	0.00238109	4.51653e-05
100124160-16-G/A	0.0108122	0.0109637	0.0138256	0.0162687	0.000178777
100124838-16-T/A	0.296766	0.359997	0.175642	0.283103	0.1049
100149882-16-A/G	0.00219808	0.0021693	-0.0132662	-0.0155457	-3.36486e-05
100173516-16-C/A	0.0116741	0.0118718	0.0166511	0.0196013	0.000233349
100185208-16-G/T	0.344242	0.448804	0.23298	0.399004	0.186028
100215005-16-A/G	0.0782358	0.0823957	0.0504872	0.0633679	0.00526518
100228591-16-A/T	0.0043626	0.0043338	-0.00664364	-0.00779351	-3.37381e-05
100119992-15-C/T	0.0116741	0.0118718	0.0166511	0.0196013	0.000233349
100121131-15-G/C	0.0108122	0.0109637	0.0138256	0.0162687	0.000178777
100121829-15-A/G	0.00219808	0.0021693	-0.0132662	-0.0155457	-3.36486e-05
100122387-15-T/C	0.0132215	0.0131885	-0.00250626	-0.00296439	-3.90794e-05
100122838-15-T/A	0.00219808	0.0021693	-0.0132662	-0.0155457	-3.36486e-05
100122938-15-G/A	0.0108122	0.0109637	0.0138256	0.0162687	0.000178777
100159335-15-T/C	0.0108122	0.0109637	0.0138256	0.0162687	0.000178777
100184737-15-A/G	0.00596396	0.00595404	-0.00166712	-0.00195718	-1.16499e-05
100211436-15-C/G	0.16464	0.279378	0.410689	0.536825	0.160243
100214401-15-T/G	0.00834595	0.00839516	0.00586214	0.00688999	5.78991e-05
100223319-15-G/C	0.225637	0.265289	0.149466	0.219715	0.0597401
100230923-15-T/G	0.00834595	0.00839516	0.00586214	0.00688999	5.78991e-05
100232368-15-C/T	0.0043626	0.0043338	-0.00664364	-0.00779351	-3.37381e-05
100119945-14-T/A	0.00219808	0.0021693	-0.0132662	-0.0155457	-3.36486e-05
100120013-14-G/A	0.00219808	0.0021693	-0.0132662	-0.0155457	-3.36486e-05
100121012-14-A/G	0.00643428	0.00636682	-0.0105956	-0.0124636	-7.92136e-05
100123243-14-G/T	0.00219808	0.0021693	-0.0132662	-0.0155457	-3.36486e-05
100123245-14-T/C	0.00219808	0.0021693	-0.0132662	-0.0155457	-3.36486e-05
100125784-14-A/G	0.00573028	0.00571657	-0.00239753	-0.00281436	-1.6082e-05
100159402-14-C/T	0.209073	0.254106	0.177219	0.25391	0.0664258
100162676-14-A/T	0.00596396	0.00595404	-0.00166712	-0.00195718	-1.16499e-05
100173371-14-T/C	0.137066	0.163471	0.161524	0.212652	0.0356983
100173947-14-T/C	0.0030137	0.00298155	-0.0107844	-0.0126426	-3.76268e-05
100226320-14-C/A	0.00573028	0.00571657	-0.00239753	-0.00281436	-1.6082e-05
100228804-14-A/G	0.213175	0.500311	0.573915	0.776682	0.425752
100120240-13-A/G	0.0042362	0.00420661	-0.00703361	-0.00825046	-3.46658e-05
100123280-13-A/G	0.00596396	0.00595404	-0.00166712	-0.00195718	-1.16499e-05
100123733-13-A/C	0.0108122	0.0109637	0.0138256	0.0162687	0.000178777
100123815-13-G/A	0.0112267	0.0113997	0.0151815	0.0178676	0.000204202
100124925-13-C/T	0.00219808	0.0021693	-0.0132662	-0.0155457	-3.36486e-05
100125967-13-A/G	0.00573028	0.00571657	-0.00239753	-0.00281436	-1.6082e-05
100128102-13-A/G	0.00521178	0.00514441	-0.0130967	-0.0153931	-7.90155e-05
100171903-13-T/C	0.0116741	0.0118718	0.0166511	0.0196013	0.000233349
100172209-13-C/A	0.0042362	0.00420661	-0.00703361	-0.00825046	-3.46658e-05
100191773-13-G/C	0.00219808	0.0021693	-0.0132662	-0.0155457	-3.36486e-05
100195569-13-G/A	0.214123	0.500473	0.572159	0.775447	0.425099
100218302-13-C/A	0.00573028	0.00571657	-0.00239753	-0.00281436	-1.6082e-05
100120021-12-G/T	0.00573028	0.00571657	-0.00239753	-0.00281436	-1.6082e-05
100121849-12-G/A	0.00219808	0.0021693	-0.0132662	-0.0155457	-3.36486e-05
100122219-12-T/C	0.00219808	0.0021693	-0.0132662	-0.0155457	-3.36486e-05
100125903-12-A/T	0.00573028	0.00571657	-0.00239753	-0.00281436	-1.6082e-05
100127423-12-C/T	0.00792835	0.0078735	-0.00696672	-0.00820233	-6.4506e-05
100127771-12-A/T	0.0042362	0.00420661	-0.00703361	-0.00825046	-3.46658e-05
100159604-12-A/T	0.0108122	0.0109637	0.0138256	0.0162687	0.000178777
100160632-12-G/T	0.00219808	0.0021693	-0.0132662	-0.0155457	-3.36486e-05
100189878-12-C/G	0.0223331	0.0235986	0.0536251	0.0634249	0.00151012
100192938-12-A/G	0.0385086	0.0404672	0.0483998	0.058258	0.00237656
100195745-12-A/C	0.0043626	0.0043338	-0.00664364	-0.00779351	-3.37381e-05
100197222-12-G/A	0.22486	0.50073	0.550936	0.759479	0.415214
100206159-12-T/G	0.339803	0.452113	0.248411	0.421528	0.198468
100231835-12-G/A	0.0188138	0.0191153	0.0157751	0.018708	0.00035855
100120585-11-G/C	0.00219808	0.0021693	-0.0132662	-0.0155457	-3.36486e-05
100121875-11-C/T	0.00219808	0.0021693	-0.0132662	-0.0155457	-3.36486e-05
100122450-11-T/A	0.0030137	0.00298155	-0.0107844	-0.0126426	-3.76268e-05
100123992-11-A/T	0.0030137	0.00298155	-0.0107844	-0.0126426	-3.76268e-05
100124068-11-A/T	0.00219808	0.0021693	-0.0132662	-0.0155457	-3.36486e-05
100124266-11-A/G	0.0108122	0.0109637	0.0138256	0.0162687	0.000178777
100124753-11-C/T	0.00219808	0.0021693	-0.0132662	-0.0155457	-3.36486e-05
100125272-11-C/T	0.00219808	0.0021693	-0.0132662	-0.0155457	-3.36486e-05
100129516-11-A/T	0.0030137	0.00298155	-0.0107844	-0.0126426	-3.76268e-05
100160279-11-C/G	0.127778	0.145087	0.119301	0.156464	0.0231522
100174279-11-G/A	0.00219808	0.0021693	-0.0132662	-0.0155457	-3.36486e-05
100191555-11-C/T	0.0116741	0.0118718	0.0166511	0.0196013	0.000233349
100196004-11-C/A	0.00219808	0.0021693	-0.0132662	-0.0155457	-3.36486e-05
100197352-11-T/A	0.00219808	0.0021693	-0.0132662	-0.0155457	-3.36486e-05
100206495-11-C/A	0.00749124	0.00751486	0.00314263	0.00369214	2.77605e-05
100210273-11-G/T	0.0116741	0.0118718	0.0166511	0.0196013	0.000233349
100224203-11-T/C	0.324479	0.404727	0.198277	0.331482	0.138593
100227640-11-A/G	0.00219808	0.0021693	-0.0132662	-0.0155457	-3.36486e-05
100119700-10-T/C	0.00219808	0.0021693	-0.0132662	-0.0155457	-3.36486e-05
100123961-10-A/G	0.00874398	0.00868111	-0.00724179	-0.00853358	-7.39916e-05
100124385-10-T/C	0.0072499	0.00717566	-0.0103471	-0.0121807	-8.72541e-05
100125047-10-C/T	0.0042362	0.00420661	-0.00703361	-0.00825046	-3.46658e-05
100157547-10-G/T	0.0108122	0.0109637	0.0138256	0.0162687	0.000178777
100168279-10-G/T	0.00573028	0.00571657	-0.00239753	-0.00281436	-1.6082e-05
100191362-10-G/T	0.0030137	0.00298155	-0.0107844	-0.0126426	-3.76268e-05
100199453-10-G/A	0.288914	0.440632	0.344318	0.534258	0.248921
100213744-10-T/C	0.243521	0.500623	0.513564	0.729587	0.396511
100217578-10-T/C	0.0112267	0.0113997	0.0151815	0.0178676	0.000204202
100224277-10-T/C	0.0739635	0.100498	0.264031	0.318619	0.0334297
100121186-9-T/A	0.0108122	0.0109637	0.0138256	0.0162687	0.000178777
100126822-9-A/G	0.0043626	0.0043338	-0.00664364	-0.00779351	-3.37381e-05
100159162-9-G/C	0.00219808	0.0021693	-0.0132662	-0.0155457	-3.36486e-05
100181909-9-A/T	0.0043626	0.0043338	-0.00664364	-0.00779351	-3.37381e-05
100189142-9-A/T	0.0331521	0.03403	0.0257975	0.0309958	0.00105932
100192688-9-T/C	0.0798646	0.0938527	0.149043	0.184396	0.017736
100198158-9-C/A	0.0030137	0.00298155	-0.0107844	-0.0126426	-3.76268e-05
100213800-9-C/T	0.00521178	0.00514441	-0.0130967	-0.0153931	-7.90155e-05
100218784-9-G/T	0.224053	0.263268	0.148954	0.218533	0.0589611
100223692-9-T/C	0.0043626	0.0043338	-0.00664364	-0.00779351	-3.37381e-05
100228079-9-G/T	0.224783	0.265317	0.152776	0.224212	0.0610021
100119698-8-A/C	0.412529	0.410615	-0.00466257	-0.00926667	-0.00380207
100119709-8-A/T	0.00219808	0.0021693	-0.0132662	-0.0155457	-3.36486e-05
100121808-8-T/C	0.0042362	0.00420661	-0.00703361	-0.00825046	-3.46658e-05
100122884-8-G/A	0.00219808	0.0021693	-0.0132662	-0.0155457	-3.36486e-05
100122909-8-T/C	0.00573028	0.00571657	-0.00239753	-0.00281436	-1.6082e-05
100123538-8-T/C	0.0042362	0.00420661	-0.00703361	-0.00825046	-3.46658e-05
100123855-8-A/G	0.0042362	0.00420661	-0.00703361	-0.00825046	-3.46658e-05
100175569-8-C/T	0.00950726	0.00945574	-0.00544876	-0.00642374	-6.06861e-05
100196974-8-G/T	0.0347115	0.0373354	0.0702787	0.0839569	0.00317128
100205455-8-G/T	0.00219808	0.0021693	-0.0132662	-0.0155457	-3.36486e-05
100205565-8-T/C	0.0914069	0.0951508	0.0393476	0.0501946	0.00480738
100215630-8-C/A	0.241227	0.477402	0.494709	0.70271	0.363135
100221081-8-T/A	0.0030137	0.00298155	-0.0107844	-0.0126426	-3.76268e-05
100232254-8-T/C	0.037796	0.0387848	0.0254942	0.0307808	0.0011989
100119977-7-C/T	0.0042362	0.00420661	-0.00703361	-0.00825046	-3.46658e-05
100122625-7-C/T	0.0043626	0.0043338	-0.00664364	-0.00779351	-3.37381e-05
100122658-7-G/T	0.00596396	0.00595404	-0.00166712	-0.00195718	-1.16499e-05
100128154-7-T/C	0.189943	0.221433	0.142208	0.20007	0.0453519
100158196-7-T/C	0.00573028	0.00571657	-0.00239753	-0.00281436	-1.6082e-05
100161831-7-A/G	0.00874398	0.00868111	-0.00724179	-0.00853358	-7.39916e-05
100179214-7-G/A	0.00219808	0.0021693	-0.0132662	-0.0155457	-3.36486e-05
100182707-7-C/A	0.00219808	0.0021693	-0.0132662	-0.0155457	-3.36486e-05
100190990-7-G/T	0.118198	0.116728	-0.0125853	-0.0166859	-0.00194364
100191980-7-C/T	0.0030137	0.00298155	-0.0107844	-0.0126426	-3.76268e-05
100192636-7-C/T	0.159801	0.187417	0.147351	0.199701	0.0383465
100121418-6-T/C	0.0043626	0.0043338	-0.00664364	-0.00779351	-3.37381e-05
100122586-6-T/C	0.0030137	0.00298155	-0.0107844	-0.0126426	-3.76268e-05
100122856-6-T/C	0.0116741	0.0118718	0.0166511	0.0196013	0.000233349
100125195-6-T/C	0.00521178	0.00514441	-0.0130967	-0.0153931	-7.90155e-05
100126632-6-A/G	0.0042362	0.00420661	-0.00703361	-0.00825046	-3.46658e-05
100159249-6-C/T	0.00219808	0.0021693	-0.0132662	-0.0155457	-3.36486e-05
100172257-6-G/A	0.313336	0.371752	0.157136	0.260166	0.0992502
100183785-6-T/C	0.0127085	0.0126926	-0.00125718	-0.0014859	-1.8856e-05
100197113-6-T/A	0.0145776	0.0149719	0.0263372	0.031045	0.000466843
100201418-6-T/A	0.131284	0.27023	0.514176	0.636023	0.186601
100221142-6-G/T	0.0108122	0.0109637	0.0138256	0.0162687	0.000178777
100119660-5-A/G	0.0146878	0.0148179	0.00877944	0.0103802	0.000154038
100120704-5-A/T	0.0042362	0.00420661	-0.00703361	-0.00825046	-3.46658e-05
100124913-5-T/G	0.0108122	0.0109637	0.0138256	0.0162687	0.000178777
100125007-5-T/C	0.0042362	0.00420661	-0.00703361	-0.00825046	-3.46658e-05
100126681-5-G/A	0.231944	0.482665	0.519451	0.726171	0.380842
100161144-5-T/A	0.0485848	0.0496218	0.0208975	0.0255365	0.00127158
100192151-5-A/G	0.193608	0.381682	0.492749	0.658793	0.2721
100217635-5-T/C	0.177652	0.373396	0.524226	0.683962	0.277702
100230437-5-C/A	0.00749124	0.00751486	0.00314263	0.00369214	2.77605e-05
