# Supplementary material for: Genetic Diversity and Population Structure in a Regional Collection of Kersting’s Groundnut (<em>Macrotyloma geocarpum </em>(Harms) Maréchal & Baudet)
Source: Preprints.org preprint supplement (doi:10.20944/preprints202009.0097.v1), 2020-09-04
Supplement: Supplementary file 3 [file Table S3.xlsx]

## Sheet: Table S3
Table S3: List of Samples with One or More Private Alleles
Sample	Population	No. Loci with Private Alleles	Loci with Private Alleles
Ats	Collines	1	100122407-65-T/A
TABOTA-3	Atacora	2	100181938-64-A/T 100123815-13-G/A
TK9-11-02	Nigeria	3	100158288-67-T/A 100184671-58-G/A 100189878-12-C/G
A10	Togo	1	100157353-30-C/T
T-6	Ghana	1	100121032-67-C/T
A2-03	Togo	2	100174936-50-G/T 100197113-6-T/A
TPAT2-A	Atacora	1	100202868-68-T/A
BUR2-02	Burkina	2	100120873-65-C/A 100191362-10-G/T
KRT-3	Atacora	1	100208362-36-T/C
A3-02	Togo	2	100224209-65-T/C 100202443-35-G/C
Gbo4	Zou	1	100227640-11-A/G
BFA0032	Burkina	4	100171360-68-C/T 100122195-67-C/A 100158280-65-A/T 100159027-63-G/A
Sem1	Zou	2	100160463-23-A/G 100180388-20-C/G
T-6-03	Ghana	1	100119681-62-G/A
E-5-02	Ghana	2	100120199-51-T/C 100121391-51-T/A
MLK	Zou	1	100149882-16-A/G
BFA0045	Burkina	2	100123263-67-T/A 100173947-14-T/C
T-1	Ghana	1	100197716-67-T/A
A7	Togo	2	100121273-56-C/T 100126835-36-T/C
BUR2	Burkina	1	100125768-67-T/A
BFA0032-02	Burkina	10	100159855-61-A/G 100209145-60-C/T 100125783-49-T/C 100174753-45-T/C 100122635-43-T/A 100122558-21-T/G 100120718-20-C/T 100156533-18-T/A 100129516-11-A/T 100122586-6-T/C
Hou	Zou	2	100160756-67-C/T 100160597-65-T/C
Bod	Zou	1	100124631-67-G/A
A3	Togo	4	100209850-68-T/C 100189953-67-G/A 100202593-66-T/A 100183880-62-C/T
BUR3	Burkina	3	100214759-66-A/G 100185152-58-T/C 100123467-56-G/A
ZKU	Zou	1	100125609-51-G/A
BUR1-02	Burkina	8	100225497-68-T/A 100122942-67-C/A 100220042-67-G/A 100190413-63-T/A 100171595-40-A/C 100124326-26-G/T 100173485-17-A/T 100198158-9-C/A
BFA0037	Burkina	1	100228518-49-C/A
Saa1	Zou	2	100123121-65-A/G 100173739-31-G/C
Dgo	Zou	1	100121952-36-C/T
Akl2	Zou	3	100119884-66-A/T 100124259-65-G/T 100190026-53-T/G
Zhla2	Zou	1	100159249-6-C/T
T-5B-02	Ghana	4	100171120-67-T/A 100124654-45-C/G 100125235-35-G/T 100119469-25-G/A
TK9-1	Nigeria	1	100157798-61-A/C
A13-02	Togo	1	100122084-52-G/A
BUR1	Burkina	6	100223796-64-C/A 100185585-48-C/T 100171595-40-A/C 100120435-22-T/C 100173485-17-A/T 100162676-14-A/T
TPAT2-B	Atacora	7	100122778-59-C/A 100185657-58-G/A 100127589-51-G/A 100122756-49-G/A 100122110-30-T/G 100125967-13-A/G 100120021-12-G/T
LeAd2	Zou	3	100228591-16-A/T 100121829-15-A/G 100119709-8-A/T
BFA0043	Burkina	1	100120660-66-C/T
Agc	Zou	8	100174752-68-T/A 100171398-67-T/A 100185700-67-A/T 100125256-66-T/A 100171613-66-T/A 100173227-64-C/T 100174890-64-C/T 100168414-30-C/T
A6	Togo	2	100125224-61-A/T 100185163-35-G/C
Soz2	Zou	2	100181956-39-C/A 100197878-34-G/A
TABOTA-1	Atacora	5	100181879-66-T/C 100193037-66-T/A 100212225-64-T/C 100157670-44-G/C 100168279-10-G/T
Kah2	Zou	1	100120088-34-T/A
BFA0050	Burkina	1	100199597-66-G/A
BFA0040-02	Burkina	1	100198603-18-A/T
BUR4	Burkina	3	100192051-51-A/G 100161034-31-G/C 100162676-14-A/T
KDG-1	Atacora	1	100156743-30-T/A
Lam1	Collines	2	100125539-66-T/A 100157772-65-C/T
BUR13	Burkina	1	100123992-11-A/T
GTA2	Zou	2	100121860-68-T/A 100205455-8-G/T
TK9-12-05	Nigeria	1	100172602-65-C/A
DKP	Zou	1	100227555-56-C/T
TABOTA-4	Atacora	2	100190706-66-G/A 100193775-65-T/C
A8	Togo	4	100157281-65-C/T 100174524-65-G/A 100192471-63-G/A 100121057-43-A/C
Zhla3	Zou	1	100122522-33-G/T
A11	Togo	2	100123923-44-T/G 100230437-5-C/A
KKGOU1-A	Atacora	2	100127304-67-T/C 100123717-20-T/A
Ako	Zou	1	100174279-11-G/A
LeAd1	Zou	3	100123879-66-T/A 100125609-51-G/A 100182707-7-C/A
BFA0041	Burkina	4	100223900-62-T/A 100160884-53-G/T 100124592-51-T/C 100191980-7-C/T
Kah1	Zou	1	100127130-67-T/C
BUR16	Burkina	2	100157108-54-T/A 100124338-48-G/A
BUR10	Burkina	1	100204577-67-T/A
Gbo4-03	Zou	1	100203333-43-G/T
Gbo3	Zou	1	100172398-67-C/A
A8-02	Togo	1	100206495-11-C/A
Agn1	Zou	7	100229260-65-C/A 100120973-44-C/A 100156428-28-C/A 100173156-17-A/C 100191773-13-G/C 100124753-11-C/T 100196004-11-C/A
A16	Togo	3	100159517-68-T/A 100158374-65-T/A 100175553-27-A/G
A14	Togo	3	100184422-66-G/T 100125393-51-C/G 100119989-37-C/T
BUR18	Burkina	4	100157263-64-A/T 100121998-52-A/G 100125015-50-A/T 100162937-34-T/G
KNDGOU-4	Atacora	4	100209096-65-C/T 100189789-64-C/A 100202485-64-G/A 100190461-22-G/A
TK9-12-03	Nigeria	4	100197886-67-A/T 100220273-67-C/A 100207656-66-T/A 100123277-56-C/T
Lal2	Zou	1	100120585-11-G/C
BUR11	Burkina	1	100157695-33-G/A
A1-02	Togo	4	100159809-63-C/T 100121711-56-A/G 100211557-42-A/C 100159100-37-G/A
KNDGOU-1	Atacora	4	100125469-65-A/G 100207518-42-C/A 100122032-21-A/G 100218302-13-C/A
LeAd2-02	Zou	10	100159727-67-T/A 100123591-57-C/A 100220080-50-G/A 100218145-48-C/T 100175159-36-T/G 100159214-33-C/A 100183102-27-C/A 100184055-26-G/A 100218144-24-A/T 100159162-9-G/C
DOV	Zou	6	100123805-33-C/A 100124256-31-A/G 100124661-30-G/A 100121875-11-C/T 100125272-11-C/T 100197352-11-T/A
BUR15	Burkina	6	100182581-66-G/T 100124606-52-T/C 100207040-52-A/G 100191281-50-G/A 100123304-35-C/T 100122035-17-C/A
KNDGOU-3	Atacora	1	100211331-55-C/A
Akl1	Zou	9	100181264-68-C/A 100184002-68-A/C 100208552-65-C/T 100122141-62-G/T 100119515-60-C/T 100124416-58-C/T 100127048-53-A/G 100193331-22-C/A 100195146-22-G/A
Lal3	Zou	4	100123868-54-A/T 100128078-50-A/T 100175892-28-A/G 100195745-12-A/C
BFA0054	Burkina	4	100229086-64-C/A 100124950-56-A/T 100121927-49-G/A 100157794-24-A/G
Bin	Zou	2	100181909-9-A/T 100122884-8-G/A
TK9-8	Nigeria	7	100207089-65-T/A 100121193-53-G/C 100126531-40-G/A 100122561-22-C/T 100119992-15-C/T 100191555-11-C/T 100210273-11-G/T
Sag2	Zou	3	100224288-68-C/T 100174304-49-C/G 100125465-32-C/A
Adc	Zou	6	100207085-66-G/A 100126545-38-G/T 100119531-36-A/T 100217341-24-C/A 100198945-20-C/A 100232368-15-C/T
TK9-11-03	Nigeria	1	100121427-40-C/T
TPAT1-A	Atacora	2	100121175-35-C/T 100125784-14-A/G
Ena2	Zou	3	100212142-65-C/T 100225025-64-C/A 100121849-12-G/A
Itk2	Collines	4	100175550-67-G/C 100199963-66-G/A 100122641-27-C/T 100221142-6-G/T
A4	Togo	1	100126999-46-T/C
BFA0057	Burkina	1	100220294-65-G/A
T-7	Ghana	4	100223962-65-C/A 100120891-59-G/A 100156130-53-C/A 100214401-15-T/G
BFA0034	Burkina	3	100196764-68-T/A 100207520-66-G/A 100119632-44-G/T
TK9-11-04	Nigeria	2	100173247-65-C/T 100184887-31-A/T
KRT-1	Atacora	2	100124204-68-T/A 100202363-67-T/A
Gbo4-02	Zou	1	100171798-65-T/C
VIV	Zou	3	100217109-67-A/T 100184332-50-T/G 100221999-42-G/T
Agn2	Zou	6	100174092-68-C/G 100205161-63-T/A 100200275-48-C/A 100199898-32-C/A 100126658-29-G/A 100125116-22-T/A
Dog	Zou	4	100126243-67-C/A 100123925-54-C/T 100123888-45-A/G 100193331-22-C/A
Hay1	Collines	5	100204818-67-T/A 100202363-66-T/A 100121708-60-G/A 100124049-38-C/T 100124913-5-T/G
KDG-2	Atacora	8	100222200-65-C/A 100198675-57-C/T 100221224-37-G/C 100172847-33-T/A 100122732-20-A/G 100226320-14-C/A 100217578-10-T/C 100158196-7-T/C
BFA0056	Burkina	1	100207387-37-G/T
LGZ	Collines	2	100192738-65-A/C 100192305-21-C/A
T-6-04	Ghana	1	100121407-56-A/G
Atc	Zou	1	100161097-66-T/A
OUA	Zou	2	100214434-62-G/T 100156638-18-A/G
T-8-03	Ghana	1	100158066-18-C/T
Fol	Zou	4	100208586-67-A/T 100120309-58-C/T 100124593-32-T/A 100124068-11-A/T
Soh	Zou	3	100160484-66-G/C 100159854-31-G/C 100122163-22-G/C
Ali1	Zou	1	100123427-67-G/A
TPAT1-B	Atacora	7	100192825-66-A/T 100156904-61-T/G 100221224-61-C/A 100123376-47-C/T 100119501-44-A/C 100159854-31-G/C 100120077-27-C/G
Hhg	Zou	3	100119826-68-T/A 100192685-68-T/C 100214178-68-T/C
BFA0052	Burkina	3	100172153-60-G/A 100120583-58-T/C 100121172-52-A/G
BFA0058	Burkina	1	100202750-50-A/C
BFA0049	Burkina	1	100185358-68-G/C
BFA0040	Burkina	2	100123986-68-G/C 100124301-48-C/T
T-4-02	Ghana	2	100121685-60-T/G 100120116-22-T/C
Lili*Sie-03	Ghana	2	100122050-68-A/G 100171149-68-C/A
Sem2	Zou	3	100181973-67-T/A 100172433-66-T/C 100172791-63-A/T
Hay2	Collines	11	100121823-65-G/T 100157035-50-C/A 100124859-33-G/T 100199699-33-G/T 100126592-32-A/G 100120604-28-C/T 100122470-23-G/A 100124153-17-A/G 100122938-15-G/A 100124266-11-A/G 100121186-9-T/A
BFA0053	Burkina	8	100121545-66-T/G 100183964-64-C/A 100159007-41-G/A 100123431-39-G/A 100196935-33-G/A 100125391-27-A/T 100204911-19-C/T 100120310-18-A/G
BFA0031	Burkina	1	100122450-11-T/A
Saz1	Zou	1	100175533-33-T/C
T-6-02	Ghana	3	100158780-62-G/A 100122420-53-C/A 100214360-33-A/C
TK9-12-06	Nigeria	2	100192480-65-C/T 100158712-39-G/A
KNDGOU-2	Atacora	4	100215956-68-T/A 100157176-66-A/G 100174201-45-G/T 100160331-23-C/T
Zke	Zou	4	100121256-68-C/A 100181488-66-C/A 100199212-65-T/A 100122219-12-T/C
Gbo2	Zou	2	100230697-64-T/A 100159434-63-C/A
A12	Togo	3	100184263-66-A/T 100172879-62-A/T 100173976-38-A/T
A9	Togo	3	100120073-65-A/T 100172320-64-G/T 100185732-33-G/A
BFA0055	Burkina	3	100197414-54-G/A 100209392-37-G/T 100123410-36-G/C
T-8-02	Ghana	2	100186320-63-G/A 100127738-39-T/C
Seg1	Zou	2	100229352-32-T/C 100124709-24-A/T
BFA0031-02	Burkina	2	100218183-65-A/T 100207546-19-A/T
T-8	Ghana	6	100183458-67-G/C 100192303-67-T/A 100119690-61-A/C 100161143-47-C/T 100125621-45-C/T 100120666-44-A/G
BFA0035	Burkina	1	100158149-65-C/T
GR	Zou	2	100158219-55-T/G 100125195-6-T/C
A5	Togo	2	100227847-68-T/G 100205110-26-G/C
Kem	Zou	4	100123597-67-G/A 100185260-66-C/A 100174562-64-C/T 100123912-51-T/C
Kno2	Collines	1	100183775-25-C/T
BFA0046	Burkina	6	100119867-67-G/A 100127501-57-T/C 100123732-49-C/T 100122298-45-T/C 100123685-40-T/C 100126838-21-T/C
BFA0033	Burkina	9	100123810-63-A/C 100197025-60-C/A 100120805-52-T/C 100122298-45-T/C 100198639-40-T/A 100122634-29-A/G 100121436-27-C/G 100212775-23-C/G 100221081-8-T/A
T-2-03	Ghana	1	100126027-60-C/T
TPAT-4	Atacora	3	100217499-61-G/T 100173071-21-G/A 100127681-20-A/T
BFA0051	Burkina	3	100193870-66-T/A 100126937-50-T/C 100123280-13-A/G
BFA0039	Burkina	3	100158626-66-G/A 100190725-37-C/T 100180356-25-C/G
BFA0042	Burkina	2	100120976-65-G/A 100184737-15-A/G
Odm2	Collines	2	100193279-67-G/T 100122190-57-G/A
T-9B-02	Ghana	1	100119977-7-C/T
BFA0041-02	Burkina	1	100119875-22-G/T
Dra	Zou	4	100126230-53-A/T 100121581-40-C/A 100158673-30-C/A 100159232-17-C/T
T-2-02	Ghana	3	100220197-66-T/A 100157393-65-C/A 100174104-22-C/A
Lal1	Zou	1	100179214-7-G/A
Kno1	Collines	4	100204354-63-C/A 100225309-39-C/T 100119855-32-C/T 100124018-16-G/T
KKGOU2-A	Atacora	3	100119889-58-T/A 100125527-38-A/T 100120814-28-C/T
TPAT1-C	Atacora	2	100191533-67-C/A 100157095-31-C/T
Gbo1	Zou	6	100120520-62-T/C 100126027-60-C/T 100120536-57-A/G 100190756-55-T/G 100123666-20-C/A 100120013-14-G/A
BUR8	Burkina	5	100231495-66-C/A 100122007-64-A/T 100157933-62-A/G 100183769-41-G/A 100218207-20-T/A
Gta1	Zou	5	100228835-60-T/C 100228834-59-T/C 100192381-53-G/A 100156622-40-A/G 100123951-20-A/G
Add	Zou	4	100119682-27-T/C 100120065-26-G/A 100120548-26-C/T 100123727-23-C/T
BFA0038	Burkina	4	100198569-44-T/A 100123797-40-C/T 100161461-38-G/A 100122658-7-G/T
BUR14	Burkina	8	100120892-58-C/T 100123585-57-C/T 100183079-56-A/G 100217689-55-A/T 100198135-47-G/A 100119560-41-G/A 100121619-38-A/G 100125195-6-T/C
Tos-02	Zou	1	100119700-10-T/C
BOLIWHITE-02	Ghana	4	100125517-34-G/C 100184089-22-C/A 100157498-21-C/A 100121808-8-T/C
TK9-12	Nigeria	10	100224360-65-A/T 100122079-62-A/C 100216028-62-C/A 100171151-60-A/T 100126937-50-T/C 100121894-43-C/T 100203383-28-C/T 100208027-19-G/T 100173516-16-C/A 100171903-13-T/C
TK9-12-02	Nigeria	6	100122109-67-A/G 100158656-64-C/T 100123443-56-T/C 100120805-52-T/C 100193103-43-T/C 100190369-34-G/T
TPAT-3	Atacora	3	100217081-65-A/C 100125189-42-C/T 100207546-19-A/T
BUR9	Burkina	4	100121299-64-A/G 100157927-63-A/C 100127392-24-A/T 100193080-20-G/C
A15	Togo	4	100221445-62-A/G 100120913-49-T/C 100122685-25-T/A 100169322-23-G/C
E-5	Ghana	5	100229526-65-A/G 100124329-64-T/A 100124858-45-G/A 100230923-15-T/G 100123855-8-A/G
Itk	Collines	12	100217529-59-C/A 100208440-55-C/T 100123680-50-T/C 100123819-48-G/A 100191421-47-T/C 100158905-46-A/G 100123753-42-G/A 100121107-35-T/A 100121131-15-G/C 100159335-15-T/C 100159604-12-A/T 100157547-10-G/T
Tow2	Zou	4	100174964-62-G/A 100156889-48-G/A 100159051-48-G/A 100158454-24-C/T
Ena1	Zou	7	100127063-65-C/A 100158232-44-A/C 100127707-23-T/C 100123243-14-G/T 100123245-14-T/C 100160632-12-G/T 100223692-9-T/C
Gbo5	Zou	18	100225184-67-T/G 100120479-63-C/T 100220416-60-A/C 100120843-57-G/A 100172750-57-T/G 100121259-56-T/C 100122494-48-G/A 100160210-46-T/C 100160697-43-A/G 100160727-36-T/C 100121018-29-G/A 100126167-29-T/A 100191964-28-T/C 100156394-25-G/T 100205033-20-C/G 100158508-19-A/C 100122838-15-T/A 100119945-14-T/A
BFA0044	Burkina	2	100174170-47-T/C 100123280-13-A/G
A13	Togo	7	100159894-52-G/A 100198111-48-G/T 100156569-44-C/T 100126691-33-G/A 100120877-32-C/T 100123951-20-A/G 100207546-19-A/T
Gbn2	Collines	5	100226926-19-T/C 100121959-18-T/A 100159762-17-C/T 100124160-16-G/A 100123733-13-A/C
TK9-12-04	Nigeria	5	100157439-66-A/G 100191830-61-G/T 100161441-42-T/C 100159626-30-T/C 100122856-6-T/C
BIPOLI-3	Atacora	11	100230361-64-C/T 100123413-62-T/G 100124736-54-A/G 100203976-50-G/T 100120935-48-A/T 100120666-44-A/G 100216343-31-T/C 100173056-20-A/T 100207546-19-A/T 100125903-12-A/T 100122909-8-T/C
Lili*Sie	Ghana	16	100123540-66-A/C 100121262-64-C/A 100126682-64-A/T 100122336-50-G/A 100123680-50-T/C 100124732-49-T/C 100121734-47-T/A 100197860-47-C/A 100127883-35-C/T 100121404-30-T/C 100212743-25-A/G 100156521-24-A/T 100122579-21-C/A 100124680-20-C/A 100120140-19-T/C 100120704-5-A/T
Lili*Sie-02	Ghana	9	100212999-62-T/C 100123494-59-A/G 100123491-55-A/G 100125433-51-C/T 100121015-48-C/T 100122921-41-A/T 100122368-26-T/C 100123035-23-A/T 100126632-6-A/G
Soz	Zou	5	100157863-67-G/C 100122292-65-A/G 100122046-32-G/A 100158018-23-C/T 100124925-13-C/T
FUNSI	Ghana	5	100120574-68-A/G 100225159-65-T/G 100186005-61-C/G 100172209-13-C/A 100123538-8-T/C
BUR12	Burkina	1	100174170-47-T/C
BOLI	Ghana	4	100214475-53-G/T 100217668-42-C/G 100125047-10-C/T 100125007-5-T/C
NAKORI	Ghana	2	100199141-35-C/A 100157284-19-A/G
PUFFEUN	Ghana	2	100157183-68-G/C 100120240-13-A/G
DOWIE	Ghana	2	100156974-21-T/G 100127771-12-A/T
