# Supplementary material for: Genetic Diversity and Population Structure in a Regional Collection of Kersting’s Groundnut (<em>Macrotyloma geocarpum </em>(Harms) Maréchal & Baudet)
Source: Preprints.org preprint supplement (doi:10.20944/preprints202009.0097.v1), 2020-09-04
Supplement: Supplementary file 4 [file Table S4.xlsx]

## Sheet: Table S4
Table S4. List of Kersting's groundnut accessions used in the study
Accession	Population	Origin	Latitude	Longitude	Seed color	Donor
Ats	Collines	Benin	8.42574	2.09302	Cream	Collected
TABOTA-3	Atacora	Benin	10.4031	1.03669	Cream	Collected
TK9-11-02	Nigeria	Nigeria	7.9021	4.5315	Black	IITA
A10	Togo	Togo	9.86473	1.08365	Black	Collected
T-6	Ghana	Ghana	10.4809	-2.41437	Dark_brown_mottled	SARI
A2-03	Togo	Togo	9.35506	0.78851	Brown	Collected
TPAT2-A	Atacora	Benin	10.5154	1.39659	Cream	Collected
BUR2-02	Burkina	Burkina Faso	12.4709	-3.21541	Cream_black_eye	INERA
KRT-3	Atacora	Benin	10.2475	0.971	Cream	Collected
A3-02	Togo	Togo	9.35506	0.78851	Black	Collected
Gbo4	Zou	Benin	7.37817	2.34097	Light_brown	Collected
BFA0032	Burkina	Burkina Faso	12.4132	-3.47808	Black	Collected
Sem1	Zou	Benin	7.05405	2.00467	Cream	Collected
BUR5	Burkina	Burkina Faso	12.4709	-3.21541	Cream_black_eye	INERA
T-6-03	Ghana	Ghana	10.4809	-2.41437	Dark_brown_mottled	SARI
E-5-02	Ghana	Ghana	10.487	-2.55939	Cream_black_eye	SARI
MLK	Zou	Benin	7.3177	2.1703	Cream	Collected
BFA0045	Burkina	Burkina Faso	12.2944	-3.30784	Cream_black_eye	Collected
T-1	Ghana	Ghana	10.344	-2.33786	Black	SARI
A7	Togo	Togo	9.78305	1.12646	Dark_brown	Collected
BUR2	Burkina	Burkina Faso	12.4709	-3.21541	Cream_black_eye	INERA
BFA0032-02	Burkina	Burkina Faso	12.4132	-3.47808	Black	Collected
KKGOU1-B	Atacora	Benin	10.1832	1.09963	Cream	Collected
Hou	Zou	Benin	7.30655	1.97058	Cream	Collected
BOLIWHITE	Ghana	Ghana	9.9333	-2.4031	Dark_brown_mottled	SARI
Bod	Zou	Benin	7.43083	2.23983	Cream	Collected
A3	Togo	Togo	9.35506	0.78851	Black	Collected
BUR3	Burkina	Burkina Faso	12.328	-3.34986	Cream_black_eye	INERA
ZKU	Zou	Benin	7.2861	2.01275	Cream	Collected
Agb	Zou	Benin	7.2133	1.976	Cream	Collected
BUR1-02	Burkina	Burkina Faso	11.1792	-4.12804	Black	INERA
BFA0037	Burkina	Burkina Faso	12.2876	-3.47808	Black	Collected
Saa1	Zou	Benin	7.47218	2.15432	Cream	Collected
E-5-03	Ghana	Ghana	10.487	-2.55939	Cream_black_eye	SARI
Dgo	Zou	Benin	7.0043	2.3909	Cream	Collected
Akl2	Zou	Benin	7.59363	1.6784	Cream	Collected
Zhla2	Zou	Benin	7.1782	2.2603	Black	Collected
T-5B-02	Ghana	Ghana	10.2715	-2.28551	Dark_brown_mottled	SARI
TK9-1	Nigeria	Nigeria	7.9021	4.5315	Black	IITA
T-9B	Ghana	Ghana	10.5765	-2.41488	Light_brown_mottled	SARI
A13-02	Togo	Togo	10.5656	0.29139	Cream	Collected
BUR1	Burkina	Burkina Faso	11.1792	-4.12804	Black	INERA
TPAT2-B	Atacora	Benin	10.5154	1.39659	Cream	Collected
LeAd2	Zou	Benin	7.21635	2.03195	Black	Collected
BFA0043	Burkina	Burkina Faso	11.6289	-5.15014	Black	Collected
Agc	Zou	Benin	8.14574	1.96627	Cream	Collected
A6	Togo	Togo	9.78713	1.22332	Cream	Collected
Soz2	Zou	Benin	7.2565	2.0238	Black	Collected
TABOTA-1	Atacora	Benin	10.3909	1.04453	Cream	Collected
Kah2	Zou	Benin	7.45562	2.06592	Cream	Collected
BFA0050	Burkina	Burkina Faso	11.8236	-5.06519	Cream_black_eye	Collected
BFA0040-02	Burkina	Burkina Faso	12.2091	-3.04378	Black	Collected
BUR4	Burkina	Burkina Faso	12.1347	-3.33305	Cream_black_eye	INERA
KDG-1	Atacora	Benin	10.3709	1.3572	Cream	Collected
Lam1	Collines	Benin	8.4883	2.421	Cream	Collected
BUR13	Burkina	Burkina Faso	11.1383	-3.97813	Cream_black_eye	INERA
GTA2	Zou	Benin	7.2246	1.97488	Cream	Collected
Kin	Zou	Benin	7.07072	2.00467	Cream	Collected
TK9-12-05	Nigeria	Nigeria	8.5381	5.1432	Brown	IITA
DKP	Zou	Benin	7.25407	1.98302	Cream	Collected
TABOTA-4	Atacora	Benin	10.3836	1.03546	Cream	Collected
A8	Togo	Togo	9.78305	1.12646	Black	Collected
Zhla3	Zou	Benin	7.1782	2.2603	Cream	Collected
A11	Togo	Togo	10.2598	0.65011	Black	Collected
KKGOU1-A	Atacora	Benin	10.1832	1.09963	Cream	Collected
Ako	Zou	Benin	7.24978	1.93313	Cream	Collected
LeAd1	Zou	Benin	7.21635	2.03195	Cream	Collected
BFA0041	Burkina	Burkina Faso	12.0208	-3.30541	Black	Collected
Kah1	Zou	Benin	7.45173	2.06917	Cream	Collected
BUR16	Burkina	Burkina Faso	11.1383	-3.97813	Black	INERA
BUR10	Burkina	Burkina Faso	10.9339	-4.37335	Cream_black_eye	INERA
GTA3	Zou	Benin	7.2246	1.97488	Cream	Collected
Gbo4-03	Zou	Benin	7.37817	2.34097	Light_brown	Collected
Gbo3	Zou	Benin	7.37817	2.34097	Cream	Collected
A8-02	Togo	Togo	9.78305	1.12646	Black	Collected
Aso	Zou	Benin	7.22585	2.02525	Cream	Collected
Agn1	Zou	Benin	7.05477	2.07812	Cream	Collected
A16	Togo	Togo	10.9304	0.45987	Cream_black_eye	Collected
A14	Togo	Togo	9.86683	1.09031	Brown	Collected
BUR18	Burkina	Burkina Faso	10.9339	-4.37335	Black	INERA
KNDGOU-4	Atacora	Benin	10.1819	1.10874	Cream	Collected
T-5B	Ghana	Ghana	10.2715	-2.28551	Dark_brown_mottled	SARI
TK9-12-03	Nigeria	Nigeria	8.5381	5.1432	Brown	IITA
Lal2	Zou	Benin	7.39202	2.10868	Cream	Collected
BUR11	Burkina	Burkina Faso	11.1792	-4.12804	Cream_black_eye	INERA
A1-02	Togo	Togo	9.43728	1.09189	Cream	Collected
KNDGOU-1	Atacora	Benin	10.1757	1.10934	Cream	Collected
T-4-03	Ghana	Ghana	10.2634	-2.5181	Cream_black_eye	SARI
LeAd2-02	Zou	Benin	7.21635	2.03195	Cream	Collected
DOV	Zou	Benin	7.17708	2.38702	Cream	Collected
BUR15	Burkina	Burkina Faso	11.1792	-4.12804	Cream_black_eye	INERA
KNDGOU-3	Atacora	Benin	10.299	1.37061	Cream	Collected
Adc-B	Zou	Benin	7.45069	2.56719	Brown	Collected
Akl1	Zou	Benin	7.59363	1.6784	Cream	Collected
Lal3	Zou	Benin	7.35292	2.10328	Cream	Collected
BFA0054	Burkina	Burkina Faso	11.1383	-3.97813	Black	Collected
Bin	Zou	Benin	7.59315	2.5404	Cream	Collected
TK9-8	Nigeria	Nigeria	7.8618	5.2058	Black	IITA
Sag2	Zou	Benin	7.47477	2.12858	Cream	Collected
Adc	Zou	Benin	7.45069	2.56719	Cream	Collected
T-9B-03	Ghana	Ghana	10.5765	-2.41488	Dark_brown_mottled	SARI
TK9-11-03	Nigeria	Nigeria	7.9021	4.5315	Black	IITA
TPAT1-A	Atacora	Benin	10.5149	1.39645	Cream	Collected
Ena2	Zou	Benin	7.2094	2.3384	Cream	Collected
Itk2	Collines	Benin	8.38098	1.84332	Cream	Collected
A4	Togo	Togo	9.26391	0.7828	Black	Collected
BFA0057	Burkina	Burkina Faso	11.1792	-4.12804	Black	Collected
T-7	Ghana	Ghana	10.3117	-2.54323	Black	SARI
BFA0034	Burkina	Burkina Faso	10.9919	-4.89602	Cream_black_eye	Collected
TK9-11-04	Nigeria	Nigeria	7.9021	4.5315	Brown	IITA
KRT-1	Atacora	Benin	10.2566	0.9982	Cream	Collected
Gbo4-02	Zou	Benin	7.37817	2.34097	Light_brown	Collected
T-5B-04	Ghana	Ghana	10.2715	-2.28551	Dark_brown_mottled	SARI
VIV	Zou	Benin	7.2215	2.3451	Cream	Collected
Agn2	Zou	Benin	7.05477	2.07812	Cream	Collected
Dog	Zou	Benin	7.5429	2.588	Cream	Collected
Hay1	Collines	Benin	7.92065	2.18334	Cream	Collected
KDG-2	Atacora	Benin	10.3945	1.3861	Cream	Collected
BFA0056	Burkina	Burkina Faso	10.9339	-4.37335	Black	Collected
LGZ	Collines	Benin	7.89351	2.088	Cream	Collected
T-6-04	Ghana	Ghana	10.4809	-2.41437	Dark_brown_mottled	SARI
Atc	Zou	Benin	7.08242	2.08323	Cream	Collected
OUA	Zou	Benin	7.05355	2.09628	Cream	Collected
T-8-03	Ghana	Ghana	10.5043	-2.51466	Dark_brown_mottled	SARI
Fol	Zou	Benin	7.20316	2.14151	Cream	Collected
Soh	Zou	Benin	7.24289	2.0057	Cream	Collected
Ali1	Zou	Benin	7.50523	1.7512	Cream	Collected
TPAT1-B	Atacora	Benin	10.5159	1.39645	Cream	Collected
Hhg	Zou	Benin	7.07785	2.09312	Cream	Collected
BFA0052	Burkina	Burkina Faso	11.3836	-4.16893	Black	Collected
BFA0058	Burkina	Burkina Faso	11.1383	-3.97813	Black	Collected
BFA0048	Burkina	Burkina Faso	11.0429	-5.06838	Black	Collected
BFA0049	Burkina	Burkina Faso	11.5062	-4.38697	Black	Collected
KRT-2	Atacora	Benin	10.2397	0.99	Cream	Collected
BFA0040	Burkina	Burkina Faso	12.2091	-3.04378	Black	Collected
KKGOU2-B	Atacora	Benin	10.1876	1.09355	Cream	Collected
T-4-02	Ghana	Ghana	10.2634	-2.5181	Cream_black_eye	SARI
Lili*Sie-03	Ghana	Ghana	10.6822	-2.5231	Brown_mottled	SARI
Sem2	Zou	Benin	7.05405	2.00467	Cream	Collected
Hay2	Collines	Benin	7.92065	2.18334	Cream	Collected
T-4	Ghana	Ghana	10.2634	-2.5181	Cream_black_eye	SARI
BFA0053	Burkina	Burkina Faso	11.1792	-4.12804	Black	Collected
Tos	Zou	Benin	7.25618	2.01208	Cream	Collected
BFA0031	Burkina	Burkina Faso	12.479	-3.37683	Black	Collected
Saz1	Zou	Benin	7.47303	2.17325	Cream	Collected
T-6-02	Ghana	Ghana	10.4809	-2.41437	Dark_brown_mottled	SARI
TK9-12-06	Nigeria	Nigeria	8.5381	5.1432	Brown	IITA
KNDGOU-2	Atacora	Benin	10.1803	1.10356	Cream	Collected
Zke	Zou	Benin	7.22707	2.23622	Cream	Collected
Gbo2	Zou	Benin	7.37817	2.34097	Cream	Collected
A12	Togo	Togo	10.5656	0.29139	Cream	Collected
A9	Togo	Togo	9.86683	1.09031	Black	Collected
BFA0055	Burkina	Burkina Faso	10.9339	-4.37335	Black	Collected
T-8-02	Ghana	Ghana	10.5043	-2.51466	Dark_brown_mottled	SARI
Seg1	Zou	Benin	7.50083	2.11578	Cream	Collected
BFA0031-02	Burkina	Burkina Faso	12.479	-3.37683	Black	Collected
Zhla1	Zou	Benin	7.1782	2.2603	Cream	Collected
T-8	Ghana	Ghana	10.5043	-2.51466	Dark_brown_mottled	SARI
BFA0035	Burkina	Burkina Faso	12.1359	-3.57749	Black	Collected
GR	Zou	Benin	7.39817	2.35097	Cream	Collected
A5	Togo	Togo	9.78713	1.22332	Cream_black_eye	Collected
Kem	Zou	Benin	7.19376	2.25176	Cream	Collected
TABOTA-2	Atacora	Benin	10.3925	1.04139	Cream	Collected
Kno2	Collines	Benin	8.2403	2.15954	Cream	Collected
BFA0046	Burkina	Burkina Faso	11.4926	-4.82307	Black	Collected
BFA0033	Burkina	Burkina Faso	11.2692	-4.33302	Cream_black_eye	Collected
T-2-03	Ghana	Ghana	10.6339	-2.42645	Light_brown_mottled	SARI
TK9-11	Nigeria	Nigeria	7.9021	4.5315	Black	IITA
TPAT-4	Atacora	Benin	10.5322	1.3512	Cream	Collected
BFA0051	Burkina	Burkina Faso	11.7326	-4.92225	Cream_black_eye	Collected
BUR7	Burkina	Burkina Faso	12.1347	-3.33305	Cream_black_eye	INERA
BFA0039	Burkina	Burkina Faso	12.026	-3.27401	Black	Collected
BFA0042	Burkina	Burkina Faso	11.0087	-4.24058	Cream_black_eye	Collected
Odm2	Collines	Benin	8.0315	2.1737	Cream	Collected
Itk1	Collines	Benin	8.38098	1.84332	Cream	Collected
T-10	Ghana	Ghana	10.356	-2.16873	Black	SARI
Gbn1	Collines	Benin	8.18858	2.27445	Cream	Collected
Sag1	Zou	Benin	7.47477	2.12858	Cream	Collected
T-9B-02	Ghana	Ghana	10.5765	-2.41488	Dark_brown_mottled	SARI
BFA0041-02	Burkina	Burkina Faso	12.0208	-3.30541	Black	Collected
T-2	Ghana	Ghana	10.6339	-2.42645	Light_brown_mottled	SARI
Dra	Zou	Benin	7.29167	2.153	Cream	Collected
T-2-02	Ghana	Ghana	10.6339	-2.42645	Light_brown_mottled	SARI
Lal1	Zou	Benin	7.39202	2.10868	Cream	Collected
Kno1	Collines	Benin	8.2403	2.15954	Cream	Collected
KKGOU2-A	Atacora	Benin	10.1876	1.09355	Cream	Collected
TPAT1-C	Atacora	Benin	10.5149	1.39745	Cream	Collected
Gbo1	Zou	Benin	7.37817	2.34097	Cream	Collected
BUR8	Burkina	Burkina Faso	12.3086	-3.1275	Black	INERA
BIPOLI-2	Atacora	Benin	10.2696	0.9515	Cream	Collected
Gta1	Zou	Benin	7.2246	1.97488	Cream	Collected
Adj	Zou	Benin	7.30655	1.97058	Cream	Collected
Add	Zou	Benin	7.20315	2.1995	Cream	Collected
BFA0038	Burkina	Burkina Faso	12.3086	-3.1275	Black	Collected
BUR14	Burkina	Burkina Faso	11.1792	-4.12804	Cream_black_eye	INERA
Tos-02	Zou	Benin	7.25618	2.01208	Cream	Collected
BOLIWHITE-02	Ghana	Ghana	9.9333	-2.4031	Dark_brown_mottled	SARI
TK9-12	Nigeria	Nigeria	8.5381	5.1432	Brown	IITA
TK9-12-02	Nigeria	Nigeria	8.5381	5.1432	Brown	IITA
TPAT-3	Atacora	Benin	10.4888	1.3908	Cream	Collected
BUR9	Burkina	Burkina Faso	12.026	-3.27401	Black	INERA
A15	Togo	Togo	10.9304	0.45987	Cream_black_eye	Collected
E-5	Ghana	Ghana	10.487	-2.55939	Cream_black_eye	SARI
Itk	Collines	Benin	8.38098	1.84332	Cream	Collected
Tow2	Zou	Benin	7.0567	2.04957	Cream	Collected
Ton	Zou	Benin	7.24228	1.9032	Cream	Collected
Ena1	Zou	Benin	7.20807	2.33892	Cream	Collected
Gbo5	Zou	Benin	7.37817	2.34097	Cream	Collected
KKGOU3	Atacora	Benin	10.1834	1.09878	Cream	Collected
BFA0044	Burkina	Burkina Faso	11.0087	-4.24058	Cream_black_eye	Collected
Saa2	Zou	Benin	7.47218	2.15432	Cream	Collected
A13	Togo	Togo	10.5656	0.29139	Cream_black_eye	Collected
Gbn2	Collines	Benin	8.18858	2.27445	Cream	Collected
TK9-12-04	Nigeria	Nigeria	8.5381	5.1432	Brown	IITA
Tow1	Zou	Benin	7.0567	2.04957	Cream	Collected
BIPOLI-3	Atacora	Benin	10.2892	0.9891	Cream	Collected
Lili*Sie	Ghana	Ghana	10.6822	-2.5231	Light_brown_mottled	SARI
BIPOLI-1	Atacora	Benin	10.2601	0.9689	Cream	Collected
Lili*Sie-02	Ghana	Ghana	10.6822	-2.5231	Brown_mottled	SARI
Soz	Zou	Benin	7.2565	2.0238	Cream	Collected
FUNSI	Ghana	Ghana	10.2916	-1.96239	Dark_brown_mottled	SARI
BUR12	Burkina	Burkina Faso	11.4926	-4.82307	Cream_black_eye	INERA
BOLI	Ghana	Ghana	9.9333	-2.4031	Cream_black_eye	SARI
SIGIRI	Ghana	Ghana	10.5995	-2.65181	Brown_mottled	SARI
NAKORI	Ghana	Ghana	10.0601	-2.50989	Brown_mottled	SARI
PUFFEUN	Ghana	Ghana	10.3238	-2.54726	Black	SARI
DOWIE	Ghana	Ghana	10.4446	-2.68417	Dark_brown_mottled	SARI
